# Supplementary material for: Heteroleptic diphosphenes and arsaphosphenes bearing neutral and anionic N-heterocyclic carbenes
Source: Royal Society of Chemistry journal article supplement (doi:10.1039/c9cc05739k), 2019-01-01
Supplement: c9cc05739k2.pdf [file c9cc05739k2.pdf]

## Supporting Information

Luong Phong Ho<sup>[a]</sup>, Marc-Kevin Zaretzke<sup>[a]</sup>, Thomas Bannenberg<sup>[a]</sup>, Matthias Tamm<sup>\*[a]</sup>

[a] Institut für Anorganische und Analytische Chemie, Technische Universität Braunschweig, Hagenring 30, 38106 Braunschweig, Germany. Fax: +49 (531) 391 5387; Tel: +49 (531) 391 5309; E-Mail: [m.tamm@tu-bs.de](mailto:m.tamm@tu-bs.de)

### Content

|                                                                                                           |    |
|-----------------------------------------------------------------------------------------------------------|----|
| S1 Materials and Methods .....                                                                            | 2  |
| S2 Synthetic Procedures.....                                                                              | 3  |
| S2.1 WCA-IDipp-P(Cl)-P=IDipp (3a) .....                                                                   | 3  |
| S2.2 WCA-IDippAs(Cl)-P=IDipp (3b).....                                                                    | 3  |
| S2.3 [WCA-IDipp-P=P-IDipp][GaCl <sub>4</sub> ] (4a) .....                                                 | 3  |
| S2.4 [WCA-IDipp-As=P-IDipp][GaCl <sub>4</sub> ] (4b) .....                                                | 4  |
| S2.5 WCA-IDipp-PP-IDipp radical .....                                                                     | 5  |
| S2.6 WCA-IDipp-AsP.IDipp radical.....                                                                     | 5  |
| S3 Crystallographic details .....                                                                         | 6  |
| S3.1 (WCA-IDipp)P(Cl)P(IDipp) .....                                                                       | 7  |
| S3.2 (WCA-IDipp)As(Cl)P(IDipp) .....                                                                      | 9  |
| S3.3 [(WCA-IDipp)P=P(IDipp)][GaCl <sub>4</sub> ] .....                                                    | 11 |
| S3.4 [(WCA-IDipp)As=P(IDipp)][GaCl <sub>4</sub> ] .....                                                   | 13 |
| S3.5 [(WCA-IDipp)PP(IDipp)]* .....                                                                        | 15 |
| S3.6 [(WCA-IDipp)AsP(IDipp)]* .....                                                                       | 17 |
| S4 <sup>1</sup> H, <sup>13</sup> C, <sup>11</sup> B, <sup>19</sup> F and <sup>31</sup> P NMR spectra..... | 19 |
| S4.1 (WCA-IDipp)P(Cl)P(IDipp) (3a) .....                                                                  | 19 |
| S4.2 (WCA-IDipp)As(Cl)P(IDipp) (3b) .....                                                                 | 23 |
| S4.3 [(WCA-IDipp)P=P(IDipp)][GaCl <sub>4</sub> ] (4a).....                                                | 26 |
| S4.3 [(WCA-IDipp)As=P(IDipp)][GaCl <sub>4</sub> ] (4b).....                                               | 32 |
| S5 X-Band EPR spectra.....                                                                                | 38 |
| S5.1 [(WCA-IDipp)PP(IDipp)]* (5a).....                                                                    | 38 |
| S5.1 [(WCA-IDipp)AsP(IDipp)]* (5b).....                                                                   | 39 |
| S6 Computational Details .....                                                                            | 40 |
| S6.1 Electron Spin Density Distribution for [(WCA-IDipp)PP(IDipp)]* (5a) .....                            | 41 |
| S6.2 Electron Spin Density Distribution for [(WCA-IDipp)AsP(IDipp)]* (5b) .....                           | 42 |
| S6.3 Plot of the Single Occupied Molecular Orbitals (SOMO) .....                                          | 43 |
| S7 References .....                                                                                       | 44 |

## S1 Materials and Methods

Unless otherwise indicated, all starting materials were obtained from commercial sources (Sigma-Aldrich, Alfa-Aeser, Roth, TCI, VWR or Fischer Chemical) and were used without further purification. Elemental analyses were carried out on a Vario Micro Cube System. All operations with air and moisture sensitive compounds were performed in a glove box under a dry argon atmosphere (MBraun 200B) or on a high vacuum line using Schlenk techniques. The  $^1\text{H}$ ,  $^{11}\text{B}$ ,  $^{13}\text{C}$ ,  $^{19}\text{F}$  and  $^{31}\text{P}$  NMR spectra were recorded on Bruker AVII 300 (300 MHz) and Bruker AV-II 600 (600 MHz). The chemical shifts are expressed in parts per million (ppm) with the residual solvent signal as internal standard for  $^1\text{H}$  and  $^{13}\text{C}$  NMR spectra. All other spectra were calibrated using external references. Coupling constants ( $J$ ) are reported in Hertz (Hz) and splitting patterns are indicated as s (singlet), d (doublet), t (triplet), sept (septet), m (multiplet) and br (broad).  $^{11}\text{B}$ ,  $^{13}\text{C}$ ,  $^{19}\text{F}$  and  $^{31}\text{P}$  NMR spectra were measured broadband proton decoupled. Hexane, THF, and toluene were purified by distillation over sodium/benzophenone and chlorobenzene over  $\text{CaH}_2$ , respectively. Deuterated solvents were purified by stirring the degassed solvents with Na/K alloy overnight and were subsequently filtered and distilled under reduced pressure. All solvents were stored over molecular sieves (4 Å) in argon atmosphere prior to use. IDipp=P(TMS) (**2**),<sup>[3]</sup> [WCA-IDipp]ECl<sub>2</sub> (**1a**: E = P; **1b**: E = As)<sup>[4]</sup> and 1,4-bis(trimethylsilyl)-1,4-dihydropyrazine<sup>[5]</sup> were prepared according to literature procedures.

The X-band EPR spectra were recorded on a Bruker EMX spectrometer. The samples were transferred into a 4 mm diameter quartz EPR tube (Wilmad 707-SQ-250M) and the spectra were simulated with EasySpin 5.2.2.<sup>[6]</sup>

## S2 Synthetic Procedures

### S2.1 WCA-IDipp-P(Cl)-P-IDipp (3a)

WCA-IDipp-PCl<sub>3</sub> (**1a**, 500 mg, 0.500 mmol, 1 eq.) was suspended in 15 mL hexane and IDipp=P(TMS) (**2**, 246 mg, 0.500 mmol, 1 eq.) dissolved in 5 mL hexane was added dropwise. The resulting dark green suspension was stirred for 3 d at room temperature. Afterwards the mixture was filtered and the remaining solid was washed with 5 × 5 ml hexane. Residual solvent was removed in vacuo, yielding the product as a brown green solid (610 mg, 0.4396 mmol, 88%).

<sup>11</sup>B-NMR (96 MHz; THF-*d*<sub>8</sub>):  $\delta$  = -15.2 (s, 1B) ppm.

<sup>19</sup>F-NMR (282 MHz; THF-*d*<sub>8</sub>):  $\delta$  = -128.0- -134.0 (m), -161.6 (t), -166.5—167.1 (m) ppm.

<sup>31</sup>P-NMR (203 MHz; THF-*d*<sub>8</sub>):  $\delta$  = 155.9 (d, <sup>1</sup>J(<sup>31</sup>P, <sup>31</sup>P) = 405 Hz, 1P), 120.7 (d, <sup>1</sup>J(<sup>31</sup>P, <sup>31</sup>P) = 370 Hz, 1P), -3.1 (d, <sup>1</sup>J(<sup>31</sup>P, <sup>31</sup>P) = 405 Hz, 1P), -31.2 (d, <sup>1</sup>J(<sup>31</sup>P, <sup>31</sup>P) = 370 Hz, 1P) ppm.

EA - Anal. calc. for C<sub>72</sub>H<sub>71</sub>BClF<sub>15</sub>N<sub>4</sub>P<sub>2</sub>: C, 62.41; H, 5.17; N, 4.04. Found: C, 61.94; H, 5.13; N, 3.84.

UV/Vis (THF):  $\lambda_{max}$  = 441 nm.

### S2.2 WCA-IDippAs(Cl)-P-IDipp (3b)

WCA-IDipp-AsCl<sub>3</sub> (**1b**, 300 mg, 0.287 mmol, 1 eq.) was suspended in 15 mL hexane and IDipp=P(TMS) (**2**, 141.4 mg, 0.287 mmol, 1 eq.) dissolved in 5 mL hexane was added dropwise. The resulting dark green suspension was stirred for 24 h at room temperature. Afterwards the mixture was filtered and the remaining solid was washed with 5 × 5 ml hexane. Residual solvent was removed in vacuo, yielding the product as a brown green solid (349 mg, 0.244 mmol, 85%).

<sup>11</sup>B-NMR (96 MHz; THF-*d*<sub>8</sub>):  $\delta$  = -15.3 (s, 1B) ppm.

<sup>19</sup>F-NMR (282 MHz; THF-*d*<sub>8</sub>):  $\delta$  = -125.0- -135.0 (m), -161.1 (t), -165.0- -168.0 (m) ppm.

<sup>31</sup>P-NMR (203 MHz; THF-*d*<sub>8</sub>):  $\delta$  = -9.2 (br s), -24.5 (s) ppm.

EA - Anal. calc. for C<sub>72</sub>H<sub>71</sub>AsBClF<sub>15</sub>N<sub>4</sub>P: C, 60.50; H, 5.01; N, 3.92. Found: C, 60.66; H, 5.069; N, 3.72.

UV/Vis (THF):  $\lambda_{max}$  = 452 nm.

### S2.3 [WCA-IDipp-P=P-IDipp][GaCl<sub>4</sub>] (4a)

WCA-IDipp-P(Cl)-P-IDipp (**2a**, 300 mg, 0.216 mmol, 1 eq.) was dissolved in 10 mL toluene and GaCl<sub>3</sub> (38.1 mg, 0.216 mmol, 1 eq.) dissolved in 5 mL toluene was added dropwise. The resulting red suspension was stirred for 3 h at room temperature. Afterwards the supernatant solution was removed via decantation. Residual solvent was removed in vacuo and afterwards co-evaporation was performed with hexane in order to convert the resulting red oil into a solid. Subsequently, the red solid was washed with 4 × 2 mL hexane and the solvent was removed in vacuo yielding the product as a red-orange solid (242 mg, 0.155 mmol, 72%). In order to obtain a better purity, **4a** can be recrystallized from a chlorobenzene solution layered with hexane at ambient temperatures.

<sup>1</sup>H-NMR (500 MHz; THF-*d*<sub>8</sub>):  $\delta$  = 8.54 (s, 2H, HC=CH), 7.96 (s, 1H, HC=CB), 7.72 (t, <sup>3</sup>J(<sup>1</sup>H, <sup>1</sup>H) = 7.8 Hz, 2H, *p*-Dipp<sub>NHC</sub>), 7.63 (t, <sup>3</sup>J(<sup>1</sup>H, <sup>1</sup>H) = 7.8 Hz, 1H, *p*-Dipp<sub>WCA-NHC</sub>), 7.56 (t, <sup>3</sup>J(<sup>1</sup>H, <sup>1</sup>H) = 7.8 Hz, 1H, *p*-Dipp<sub>WCA-NHC</sub>), 7.44 (d, <sup>3</sup>J(<sup>1</sup>H, <sup>1</sup>H) = 7.9 Hz, 4H, *m*-Dipp<sub>NHC</sub>), 7.34 (d, <sup>3</sup>J(<sup>1</sup>H, <sup>1</sup>H) = 7.8 Hz, 2H, *m*-Dipp<sub>WCA-NHC</sub>), 7.20 (d, <sup>3</sup>J(<sup>1</sup>H, <sup>1</sup>H) = 7.2 Hz, 2H, *m*-Dipp<sub>WCA-NHC</sub>), 2.70-2.63 (m, 2H, CH(CH<sub>3</sub>)<sub>2</sub> WCA-NHC), 2.28-2.20 (m, 6H, CH(CH<sub>3</sub>)<sub>2</sub>), 1.16 (d, <sup>3</sup>J(<sup>1</sup>H, <sup>1</sup>H) = 6.7 Hz, 12H, CH(CH<sub>3</sub>)<sub>2</sub> NHC), 1.08 (d, <sup>3</sup>J(<sup>1</sup>H, <sup>1</sup>H) = 6.7 Hz, 6H, CH(CH<sub>3</sub>)<sub>2</sub> WCA-NHC), 1.03 (d, <sup>3</sup>J(<sup>1</sup>H, <sup>1</sup>H) = 6.8 Hz, 12H,

CH(CH<sub>3</sub>)<sub>2</sub> NHC), 0.92 (d, <sup>3</sup>J(<sup>1</sup>H, <sup>1</sup>H) = 6.8 Hz, 6H, CH(CH<sub>3</sub>)<sub>2</sub> WCA-NHC), 0.87 (d, <sup>3</sup>J(<sup>1</sup>H, <sup>1</sup>H) = 6.4 Hz, 6H, CH(CH<sub>3</sub>)<sub>2</sub> WCA-NHC), 0.65 (d, <sup>3</sup>J(<sup>1</sup>H, <sup>1</sup>H) = 6.7 Hz, 6H, CH(CH<sub>3</sub>)<sub>2</sub> WCA-NHC) ppm.

<sup>11</sup>B-NMR (96 MHz; THF-*d*<sub>8</sub>): δ = -15.7 (s, 1B) ppm.

<sup>13</sup>C-NMR (151 MHz; THF-*d*<sub>8</sub>): δ = 160.26-159.55 (m, 1C, N-C-N<sub>WCA-NHC</sub>, detected by HMBC), 149.69-149.55 (m, 3C, Ar<sup>F</sup>), 149.23-148.55 (m, 1C, N-C-N<sub>NHC</sub>), 148.41-148.13 (m, 1C, HC=C<sub>B</sub>), 148.12-148.00 (m, 3C, Ar<sup>F</sup>), 145.72 (s, 2C, *o*-Dipp<sub>WCA-NHC</sub>), 144.69 (s, 4C, *o*-Dipp<sub>NHC</sub>), 144.42 (s, 2C, *o*-Dipp<sub>WCA-NHC</sub>), 140.14-139.95 (m, 3C, Ar<sup>F</sup>), 140.0 (s, 1C, HC=C<sub>B</sub>) 138.42-138.24 (m, 3C, Ar<sup>F</sup>), 137.72-137.50 (m, 3C, Ar<sup>F</sup>), 136.06-135.80 (m, 3C, Ar<sup>F</sup>), 133.89 (s, 1C, *p*-Dipp<sub>WCA-NHC</sub>), 133.02 (s, 2C, *p*-Dipp<sub>NHC</sub>) 132.76 (s, 1C, *p*-Dipp<sub>WCA-NHC</sub>), 132.02 (s, 1C, *ipso*-Dipp<sub>WCA-NHC</sub>), 131.22 (m, 2C, HC=CH), 130.53-130.40 (m, 2C, *ipso*-Dipp<sub>NHC</sub>), 130.30-130.04 (s, 1C, *ipso*-Dipp<sub>WCA-NHC</sub>), 126.54 (s, 2C, *m*-Dipp<sub>WCA-NHC</sub>) 125.66 (s, 4C, *m*-Dipp<sub>NHC</sub>), 125.04 (s, 2C, *m*-Dipp<sub>WCA-NHC</sub>), 29.51 (s, 4C, CH(CH<sub>3</sub>)<sub>2</sub> NHC), 28.71 (s, 2C, CH(CH<sub>3</sub>)<sub>2</sub> WCA-NHC), 28.06 (s, 2C, CH(CH<sub>3</sub>)<sub>2</sub> WCA-NHC), 26.32 (s, 2C, CH(CH<sub>3</sub>)<sub>2</sub> WCA-NHC), 23.39 (s, 2C, CH(CH<sub>3</sub>)<sub>2</sub> WCA-NHC), 22.36 (s, 4C, CH(CH<sub>3</sub>)<sub>2</sub> NHC), 21.58 (s, 2C, CH(CH<sub>3</sub>)<sub>2</sub> WCA-NHC) ppm. One signal corresponding to CH(CH<sub>3</sub>)<sub>2</sub> WCA-NHC and one signal corresponding to CH(CH<sub>3</sub>)<sub>2</sub> NHC is overlaid with the residual solvent signal of the THF-*d*<sub>8</sub>.

<sup>19</sup>F-NMR (282 MHz; THF-*d*<sub>8</sub>): δ = -124.9--132.6 (m, 6F), -164.0--164.8 (m, 6F), -167.8—168.9 (m, 6F) ppm.

<sup>31</sup>P-NMR (203 MHz; THF-*d*<sub>8</sub>): δ = 456.3 (d, <sup>1</sup>J(<sup>31</sup>P, <sup>31</sup>P) = 552.3 Hz, 1P), 403.4 (d, <sup>1</sup>J(<sup>31</sup>P, <sup>31</sup>P) = 556.7 Hz, 1P) ppm.

EA - Anal. calc. for C<sub>72</sub>H<sub>71</sub>BCl<sub>4</sub>F<sub>15</sub>GaN<sub>4</sub>P<sub>2</sub> : C, 55.38; H, 4.58; N, 3.59. Found: C, 54.98; H, 4.38; N, 3.19.

UV/Vis (THF): λ<sub>max</sub> = 465 nm.

#### S2.4 [WCA-IDipp-As=P-IDipp][GaCl<sub>4</sub>] (4b)

WCA-IDipp-As(Cl)-P-IDipp (**2b**, 200 mg, 0.140 mmol, 1 eq.) was dissolved in 5 mL toluene and GaCl<sub>3</sub> (33.5 mg, 0.140 mmol, 1 eq.) dissolved in 2 ml toluene was added dropwise. The resulting dark red suspension was stirred for 2 h at room temperature. Afterwards the supernatant solution was removed via decantation. Residual solvent was removed in vacuo and afterwards co-evaporation was performed with hexane in order to convert the resulting dark red oil into a solid. Subsequently, the solid was washed with 4 × 2 mL hexane and the solvent was removed in vacuo. The crude solid was recrystallized from a chlorobenzene solution layered with hexane at ambient temperatures yielding the product as red crystals (132 mg, 0.077 mmol, 55%).

<sup>1</sup>H-NMR (600 MHz; THF-*d*<sub>8</sub>): δ = 8.64 (s, 2H, HC=CH), 7.78 (s, 1H, HC=CB), 7.70 (t, <sup>3</sup>J(<sup>1</sup>H, <sup>1</sup>H) = 7.8 Hz, 2H, *p*-Dipp<sub>NHC</sub>), 7.56-7.53 (m, 2H, *p*-Dipp<sub>WCA-NHC</sub>), 7.45 (d, <sup>3</sup>J(<sup>1</sup>H, <sup>1</sup>H) = 7.8 Hz, 4H, *m*-Dipp<sub>NHC</sub>), 7.29 (d, <sup>3</sup>J(<sup>1</sup>H, <sup>1</sup>H) = 7.8 Hz, 2H, *m*-Dipp<sub>WCA-NHC</sub>), 7.22 (d, <sup>3</sup>J(<sup>1</sup>H, <sup>1</sup>H) = 7.5 Hz, 2H, *m*-Dipp<sub>WCA-NHC</sub>), 2.74 (sept, <sup>3</sup>J(<sup>1</sup>H, <sup>1</sup>H) = 6.7 Hz, 2H, CH(CH<sub>3</sub>)<sub>2</sub> WCA-NHC), 2.29-2.23 (m, 6H, CH(CH<sub>3</sub>)<sub>2</sub> WCA-NHC and CH(CH<sub>3</sub>)<sub>2</sub> NHC), 1.19 (d, <sup>3</sup>J(<sup>1</sup>H, <sup>1</sup>H) = 6.7 Hz, 12H, CH(CH<sub>3</sub>)<sub>2</sub> NHC), 1.08 (d, <sup>3</sup>J(<sup>1</sup>H, <sup>1</sup>H) = 6.7 Hz, 6H, CH(CH<sub>3</sub>)<sub>2</sub> WCA-NHC), 1.05 (d, <sup>3</sup>J(<sup>1</sup>H, <sup>1</sup>H) = 6.8 Hz, 12H, CH(CH<sub>3</sub>)<sub>2</sub> NHC), 0.91 (d, <sup>3</sup>J(<sup>1</sup>H, <sup>1</sup>H) = 6.8 Hz, 6H, CH(CH<sub>3</sub>)<sub>2</sub> WCA-NHC), 0.88 (d, <sup>3</sup>J(<sup>1</sup>H, <sup>1</sup>H) = 6.7 Hz, 6H, CH(CH<sub>3</sub>)<sub>2</sub> WCA-NHC), 0.72 (d, <sup>3</sup>J(<sup>1</sup>H, <sup>1</sup>H) = 6.7 Hz, 6H, CH(CH<sub>3</sub>)<sub>2</sub> WCA-NHC).

<sup>11</sup>B-NMR (96 MHz; THF-*d*<sub>8</sub>): δ = -15.7 (s, 1B) ppm.

<sup>13</sup>C-NMR (151 MHz; THF-*d*<sub>8</sub>): δ = 157.19-155.84 (m, 1C, N-C-N<sub>WCA-NHC</sub>, detected by HMBC), 154.15-154.05 (m, 1C, HC=C<sub>B</sub>, detected by HMBC), 151.97-151.08 (m, 1C, N-C-N<sub>NHC</sub>, detected by HMBC), 149.73-149.52 (m, 3C, Ar<sup>F</sup>), 148.17-147.89 (m, 3C, Ar<sup>F</sup>), 145.89 (s, 2C, *o*-Dipp<sub>WCA-NHC</sub>), 144.72 (s, 6C, *o*-Dipp<sub>WCA-NHC</sub> and *o*-Dipp<sub>NHC</sub>), 140.14-139.78 (m, 3C, Ar<sup>F</sup>), 138.41-138.11 (m, 3C, Ar<sup>F</sup>), 138.05 (s, 1C, HC=C<sub>B</sub>, detected by HMBC) 137.69-137.49 (m, 3C, Ar<sup>F</sup>), 136.07-

135.75 (m, 3C, Ar<sup>F</sup>), 133.38 (s, 1C, *p*-Dipp<sub>WCA-NHC</sub>), 133.26 (s, 2C, *p*-Dipp<sub>NHC</sub>), 133.18-132.98 (m, 1C, *ipso*-Dipp<sub>WCA-NHC</sub>), 132.51 (s, 1C, *p*-Dipp<sub>WCA-NHC</sub>), 131.40 (s, 2C, HC=CH), 131.02 (s, 1C, *ipso*-Dipp<sub>WCA-NHC</sub>), 130.61 (s, 2C, *ipso*-Dipp<sub>NHC</sub>), 126.13 (s, 2C, *m*-Dipp<sub>WCA-NHC</sub>), 126.02 (s, 4C, *m*-Dipp<sub>NHC</sub>), 125.54 (s, 2C, *m*-Dipp<sub>WCA-NHC</sub>), 29.45 (s, 4C,  $\underline{\text{C}}\text{H}(\text{CH}_3)_2$  NHC), 28.65 (s, 2C,  $\underline{\text{C}}\text{H}(\text{CH}_3)_2$  WCA-NHC), 27.99 (s, 2C,  $\underline{\text{C}}\text{H}(\text{CH}_3)_2$  WCA-NHC), 26.91 (s, 2C,  $\text{CH}(\underline{\text{C}}\text{H}_3)_2$  WCA-NHC), 23.23 (s,  $\text{CH}(\underline{\text{C}}\text{H}_3)_2$  WCA-NHC), 22.53 (s,  $\text{CH}(\underline{\text{C}}\text{H}_3)_2$  NHC), 21.63 (s,  $\text{CH}(\underline{\text{C}}\text{H}_3)_2$  WCA-NHC) ppm. One signal corresponding to  $\text{CH}(\underline{\text{C}}\text{H}_3)_2$  WCA-NHC and one signal corresponding to  $\text{CH}(\underline{\text{C}}\text{H}_3)_2$  NHC is overlaid with the residual solvent signal of the THF-*d*<sub>8</sub>.

<sup>19</sup>F-NMR (282 MHz; THF-*d*<sub>8</sub>):  $\delta$  = -126.1- -131.4 (m, 6F), -163.5- -164.1 (m, 6F), -168.0 - -168.4 (m, 6F) ppm.

<sup>31</sup>P-NMR (203 MHz; THF-*d*<sub>8</sub>):  $\delta$  = 456.0 (s, 1P) ppm.

EA - Anal. calc. for C<sub>72</sub>H<sub>71</sub>AsBCl<sub>4</sub>F<sub>15</sub>GaN<sub>4</sub>P: C, 53.86; H, 4.46; N, 3.49. Found: C, 53.70; H, 4.443; N, 3.20.

UV/Vis (THF):  $\lambda_{\text{max}}$  = 472 nm.

### S2.5 WCA-IDipp-PP-IDipp radical

WCA-IDipp-P(Cl)-P=IDipp (**2a**, 50 mg, 0.036 mmol, 1 eq.) was dissolved in 2 mL thf and 1,4-bis(trimethylsilyl)-1,4-dihydropyrazine (4 mg, 0.018 mmol, 0.5 eq.) dissolved in 2 mL thf was added dropwise. The dark blue green solution was stirred over night at room temperature and afterwards the thf was removed in vacuo. The resulting dark green solid was washed with 5 × 3 mL hexane and then recrystallized by layering a toluene solution with hexane at room temperature. After 5 d the supernatant solution was discarded and residual solvent was removed in vacuo, yielding the product as a dark green solid (22 mg, 0.016 mmol, 45%).

EA - Anal. calc. for C<sub>72</sub>H<sub>71</sub>BF<sub>15</sub>N<sub>4</sub>P<sub>2</sub> · toluene: C, 65.79; H, 5.52; N, 3.88. Found: C, 65.41; H, 5.024; N, 4.04.

UV/Vis (THF):  $\lambda_{\text{max}}$  = 614 nm.

### S2.6 WCA-IDipp-AsP.IDipp radical

WCA-IDipp-As(Cl)-P=IDipp (**2b**, 50 mg, 0.035 mmol, 1 eq.) was dissolved in 2 mL thf and 1,4-bis(trimethylsilyl)-1,4-dihydropyrazine (4 mg, 0.017 mmol, 0.5 eq.) dissolved in 2 mL thf was added dropwise. The dark green solution was stirred over night at room temperature and afterwards the thf was removed in vacuo. The resulting dark green solid was washed with 5 × 3 mL hexane and then recrystallized by layering a DCM solution with hexane at room temperature. After 14 d the supernatant solution was discarded and residual solvent was removed in vacuo, yielding the product as a dark green solid (17 mg, 0.012 mmol, 35%).

EA - Anal. calc. for C<sub>72</sub>H<sub>71</sub>AsBF<sub>15</sub>N<sub>4</sub>P: C, 62.03; H, 5.13; N, 4.02. Found: C, 62.15; H, 5.095; N, 4.03.

UV/Vis (THF):  $\lambda_{\text{max}}$  = 645 nm.

### S3 Crystallographic details

Suitable single crystals were mounted on a hair or on a MiTiGen mount in perfluorinated inert oil. The intensity measurements were performed at 100 K on an Oxford Diffraction Nova A and a Rigaku XtaLAB Synergy S Single Source diffractometer using mirror-focussed CuK $\alpha$  radiation. The diffractometer software CrysAlisPRO was employed.<sup>[1]</sup> Absorption corrections were based on multiscans. The structures were refined anisotropically on  $F^2$  using SHELXL-2014/7 or -2018.<sup>[2]</sup> Hydrogen atoms were included using a riding model or rigid methyl groups. Further details are given in Table S1-6.

*Solvent content:* The chloride species **3a** and **3b** contain one non-coordinated benzene molecule; both are ordered. The diphosphene **4a** crystallizes with two molecules of chlorobenzene, which are formally ordered but display high  $U$  values. The diarsene **4a** contains one non-coordinated toluene molecule. The radical **5a** contains a thf molecule disordered over a special position, so the overall composition is half a solvate per asymmetric unit. The radical **5b** contains a chlorobenzene molecule disordered over a special position, so the overall composition is half a solvate per asymmetric unit.

*Exceptions and special details:* The solvent molecules in **4a**, **5a** and **5b** were refined using appropriate restraints to improve stability of refinement, but the dimensions are not entirely satisfactory and should be interpreted with caution.

Complete data have been deposited with the Cambridge Crystallographic Data Centre under the CCDC numbers 1942669-1942674 for compounds **3a**, **3b**, **4a**, **4b**, **5a** and **5b**. These data can be obtained free of charge from <http://www.ccdc.cam.ac.uk/>.

### S3.1 (WCA-IDipp)P(Cl)P(IDipp)

Table S1. Crystallographic data for compound 3a.

| Compound                          | 3a                                                                               |                 |
|-----------------------------------|----------------------------------------------------------------------------------|-----------------|
| Identification code (CCDC)        | 1942669                                                                          |                 |
| Empirical formula                 | C <sub>75</sub> H <sub>74</sub> BClF <sub>15</sub> N <sub>4</sub> P <sub>2</sub> |                 |
| Formula weight                    | 1424.58                                                                          |                 |
| Temperature                       | 100(2) K                                                                         |                 |
| Wavelength                        | 1.54184 Å                                                                        |                 |
| Crystal system                    | Triclinic                                                                        |                 |
| Space group                       | P-1                                                                              |                 |
| Unit cell dimensions              | a = 13.5450(6) Å                                                                 | ∠ = 99.475(4)°  |
|                                   | b = 14.3760(10) Å                                                                | β = 93.788(4)°  |
|                                   | c = 19.5043(8) Å                                                                 | γ = 109.582(4)° |
| Volume                            | 3499.3(3) Å <sup>3</sup>                                                         |                 |
| Z                                 | 2                                                                                |                 |
| Density (calculated)              | 1.352 Mg/m <sup>3</sup>                                                          |                 |
| Absorption coefficient            | 1.657 mm <sup>-1</sup>                                                           |                 |
| F(000)                            | 1478                                                                             |                 |
| Crystal habitus                   | irregular (orange)                                                               |                 |
| Crystal size                      | 0.391 x 0.157 x 0.080 mm <sup>3</sup>                                            |                 |
| Theta range for data collection   | 3.329 to 76.204°                                                                 |                 |
| Index ranges                      | -13<=h<=17, -18<=k<=17, -24<=l<=24                                               |                 |
| Reflections collected             | 70864                                                                            |                 |
| Independent reflections           | 14515 [R(int) = 0.0707]                                                          |                 |
| Completeness to theta = 67.684°   | 100.0 %                                                                          |                 |
| Max. and min. transmission        | 0.985 and 0.951                                                                  |                 |
| Data / restraints / parameters    | 14515 / 0 / 899                                                                  |                 |
| Goodness-of-fit on F <sup>2</sup> | 1.038                                                                            |                 |
| Final R indices [I>2sigma(I)]     | R1 = 0.0579, wR2 = 0.1521                                                        |                 |
| R indices (all data)              | R1 = 0.0773, wR2 = 0.1668                                                        |                 |
| Largest diff. peak and hole       | 0.692 and -0.440 e.Å <sup>-3</sup>                                               |                 |

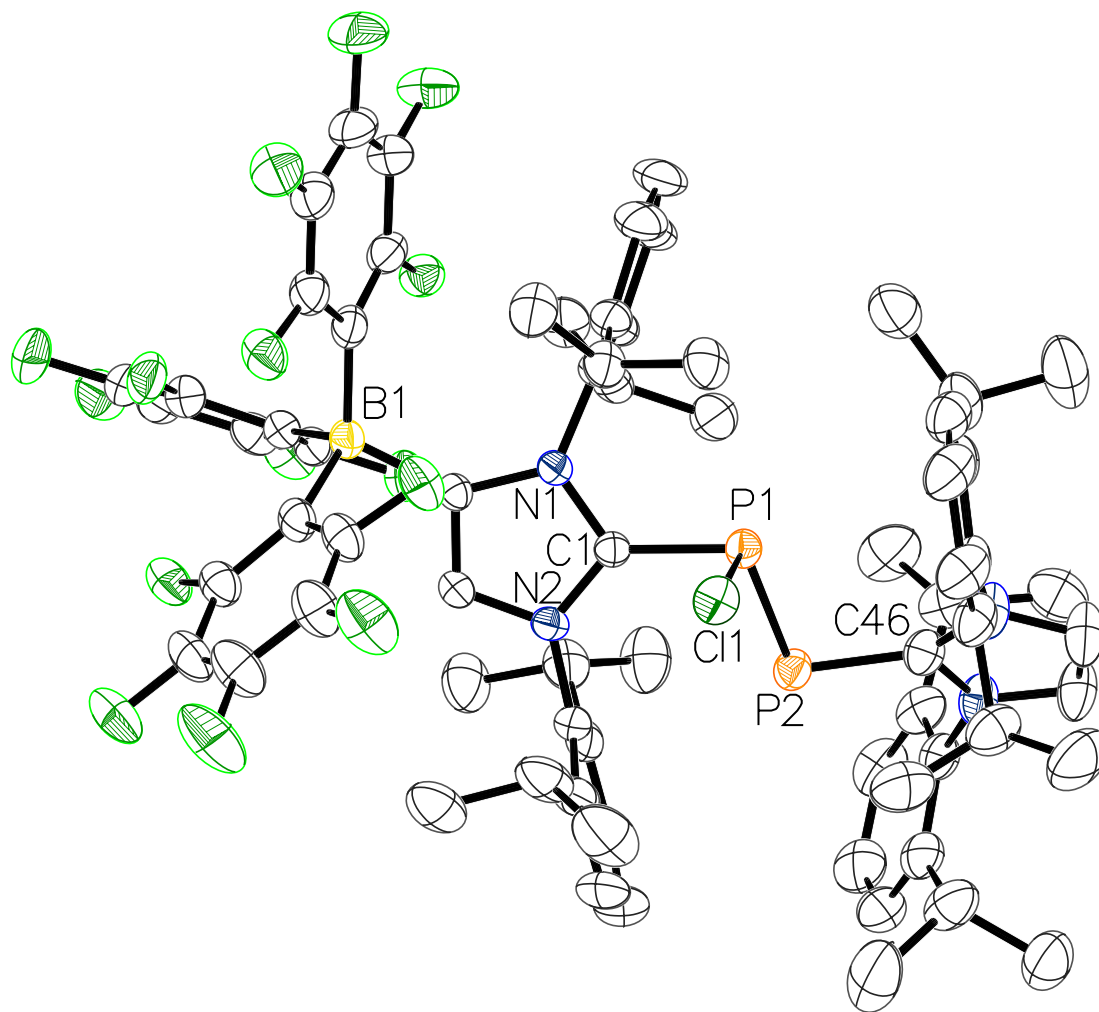

**Figure S1a.** Molecular structure of (WCA-IDipp)P(Cl)P(IDipp) (**3a**); thermal ellipsoids are drawn at 50% probability. Hydrogen atoms and one co-crystallized benzene molecule are omitted for clarity.



### S3.2 (WCA-IDipp)As(Cl)P(IDipp)

Table S2 Crystallographic data for compound **3b**.

|                                   |                                                                       |                 |
|-----------------------------------|-----------------------------------------------------------------------|-----------------|
| Compound                          | <b>3b</b>                                                             |                 |
| Identification code (CCDC)        | 1942670                                                               |                 |
| Empirical formula                 | C <sub>75</sub> H <sub>74</sub> AsBCIF <sub>15</sub> N <sub>4</sub> P |                 |
| Formula weight                    | 1468.53                                                               |                 |
| Temperature                       | 100(2) K                                                              |                 |
| Wavelength                        | 1.54184 Å                                                             |                 |
| Crystal system                    | Triclinic                                                             |                 |
| Space group                       | <i>P</i> -1                                                           |                 |
| Unit cell dimensions              | a = 13.5035(8) Å                                                      | α = 99.868(4)°  |
|                                   | b = 14.3960(8) Å                                                      | β = 93.997(4)°  |
|                                   | c = 19.4613(8) Å                                                      | γ = 108.674(5)° |
| Volume                            | 3499.4(3) Å <sup>3</sup>                                              |                 |
| Z                                 | 2                                                                     |                 |
| Density (calculated)              | 1.394 Mg/m <sup>3</sup>                                               |                 |
| Absorption coefficient            | 1.966 mm <sup>-1</sup>                                                |                 |
| F(000)                            | 1514                                                                  |                 |
| Crystal habitus                   | plate (yellow)                                                        |                 |
| Crystal size                      | 0.135 x 0.055 x 0.026 mm <sup>3</sup>                                 |                 |
| Theta range for data collection   | 3.311 to 76.706°                                                      |                 |
| Index ranges                      | -16 ≤ h ≤ 16, -18 ≤ k ≤ 18, -24 ≤ l ≤ 18                              |                 |
| Reflections collected             | 82893                                                                 |                 |
| Independent reflections           | 14545 [R(int) = 0.1297]                                               |                 |
| Completeness to theta = 67.684°   | 100.0 %                                                               |                 |
| Max. and min. transmission        | 0.996 and 0.986                                                       |                 |
| Data / restraints / parameters    | 14545 / 0 / 899                                                       |                 |
| Goodness-of-fit on F <sup>2</sup> | 1.032                                                                 |                 |
| Final R indices [I > 2σ(I)]       | R1 = 0.0563, wR2 = 0.1329                                             |                 |
| R indices (all data)              | R1 = 0.0888, wR2 = 0.1555                                             |                 |
| Largest diff. peak and hole       | 0.666 and -0.758 e.Å <sup>-3</sup>                                    |                 |

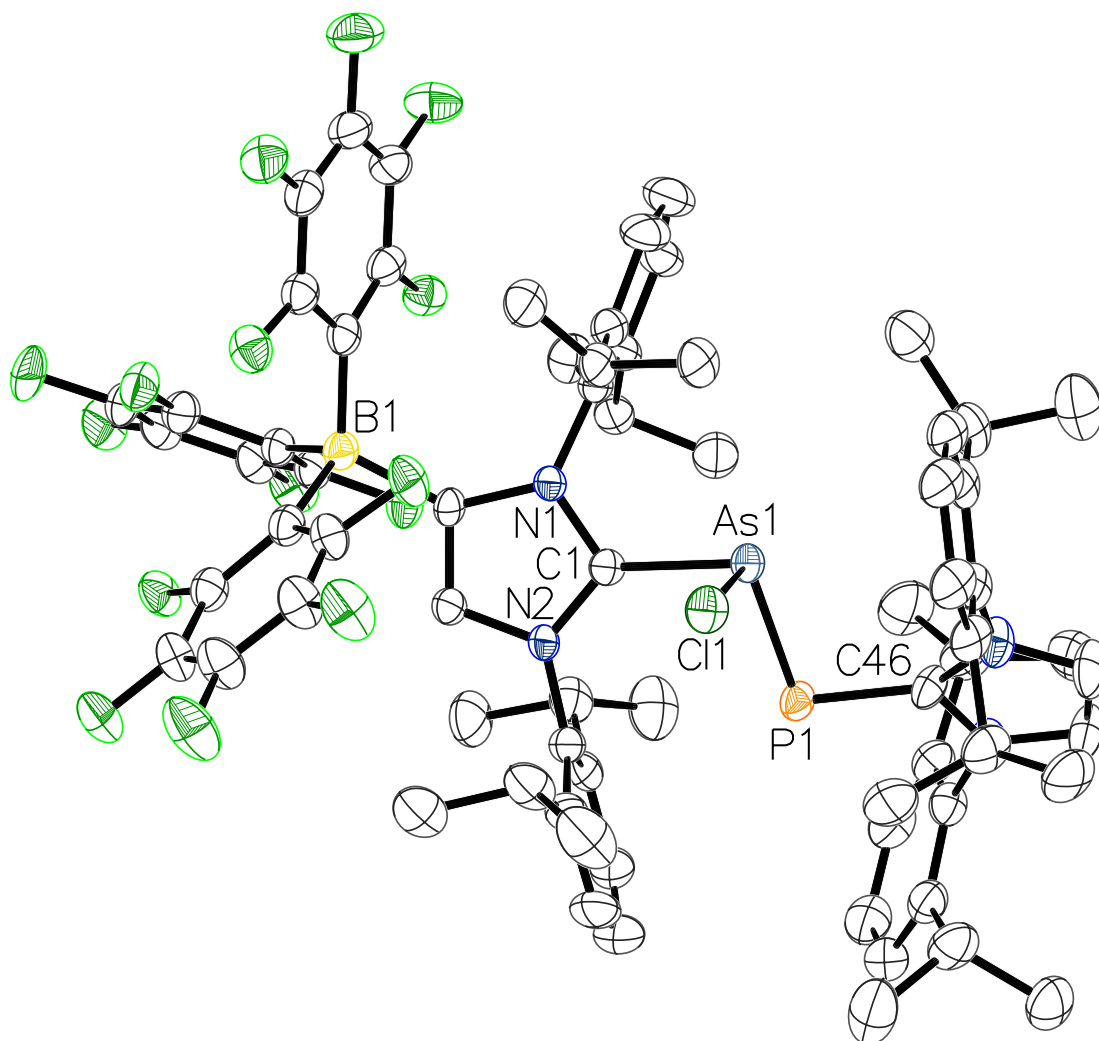

**Figure S2.** Molecular structure of (WCA-IDipp)As(Cl)P(IDipp) (**3b**); thermal ellipsoids are drawn at 50% probability. Hydrogen atoms and one co-crystallized benzene molecule are omitted for clarity.

**S3.3 [(WCA-IDipp)P=P(IDipp)][GaCl<sub>4</sub>]****Table S3** Crystallographic data for compound **4a**.

|                                   |                                                                                                   |                  |
|-----------------------------------|---------------------------------------------------------------------------------------------------|------------------|
| Compound                          | <b>4a</b>                                                                                         |                  |
| Identification code (CCDC)        | 1942671                                                                                           |                  |
| Empirical formula                 | C <sub>78</sub> H <sub>76</sub> BCl <sub>15</sub> F <sub>15</sub> GaN <sub>4</sub> P <sub>2</sub> |                  |
| Formula weight                    | 1674.14                                                                                           |                  |
| Temperature                       | 100(2) K                                                                                          |                  |
| Wavelength                        | 1.54184 Å                                                                                         |                  |
| Crystal system                    | Triclinic                                                                                         |                  |
| Space group                       | <i>P</i> -1                                                                                       |                  |
| Unit cell dimensions              | a = 10.6105(2) Å                                                                                  | α = 83.1200(10)° |
|                                   | b = 14.4633(2) Å                                                                                  | β = 89.6020(10)° |
|                                   | c = 26.9560(4) Å                                                                                  | γ = 72.833(2)°   |
| Volume                            | 3922.23(12) Å <sup>3</sup>                                                                        |                  |
| Z                                 | 2                                                                                                 |                  |
| Density (calculated)              | 1.418 Mg/m <sup>3</sup>                                                                           |                  |
| Absorption coefficient            | 3.132 mm <sup>-1</sup>                                                                            |                  |
| F(000)                            | 1716                                                                                              |                  |
| Crystal habitus                   | irregular (orange)                                                                                |                  |
| Crystal size                      | 0.329 x 0.237 x 0.189 mm <sup>3</sup>                                                             |                  |
| Theta range for data collection   | 3.223 to 76.209°                                                                                  |                  |
| Index ranges                      | -12 ≤ h ≤ 13, -18 ≤ k ≤ 18, -33 ≤ l ≤ 33                                                          |                  |
| Reflections collected             | 161786                                                                                            |                  |
| Independent reflections           | 16378 [R(int) = 0.0815]                                                                           |                  |
| Completeness to theta = 67.684°   | 100.0 %                                                                                           |                  |
| Max. and min. transmission        | 0.973 and 0.960                                                                                   |                  |
| Data / restraints / parameters    | 16378 / 271 / 1080                                                                                |                  |
| Goodness-of-fit on F <sup>2</sup> | 1.035                                                                                             |                  |
| Final R indices [I > 2σ(I)]       | R1 = 0.0554, wR2 = 0.1541                                                                         |                  |
| R indices (all data)              | R1 = 0.0704, wR2 = 0.1688                                                                         |                  |
| Largest diff. peak and hole       | 0.985 and -1.261 e.Å <sup>-3</sup>                                                                |                  |

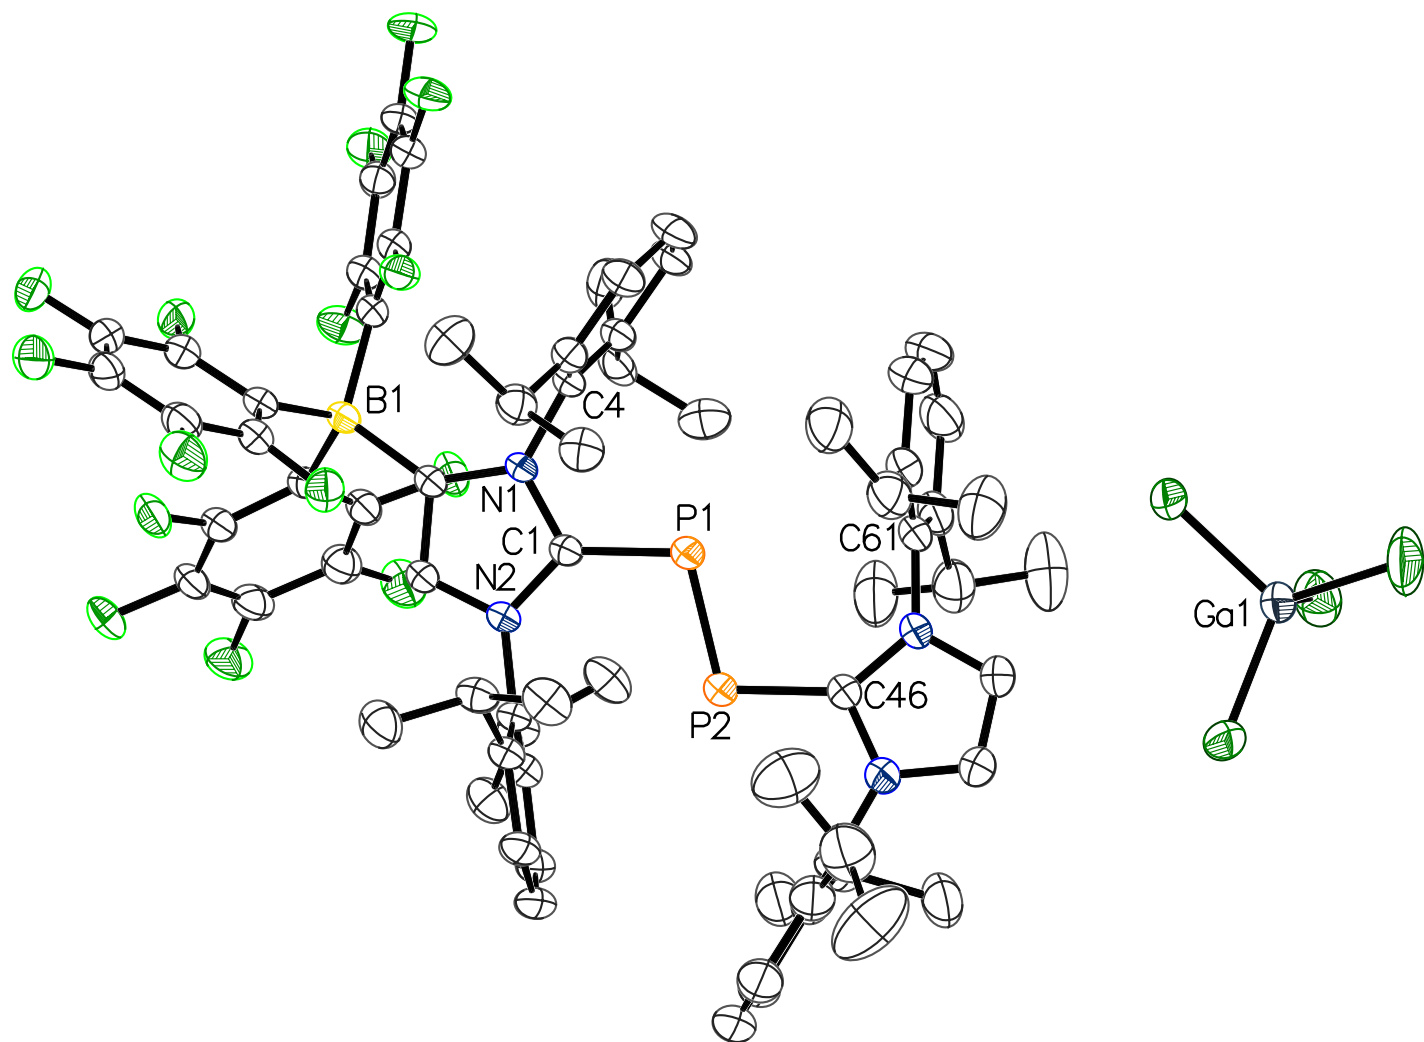

**Figure S3.** Molecular structure of  $[(\text{WCA-IDipp})\text{P}=\text{P}-(\text{IDipp})][\text{GaCl}_4]$  (**4a**); thermal ellipsoids are drawn at 50% probability. Hydrogen atoms and two co-crystallized chlorobenzene molecules are omitted for clarity.

**S3.4 [(WCA-IDipp)As=P(IDipp)][GaCl<sub>4</sub>]****Table S4** Crystallographic data for compound **4b**.

|                                   |                                                                                       |                 |
|-----------------------------------|---------------------------------------------------------------------------------------|-----------------|
| Compound                          | <b>4b</b>                                                                             |                 |
| Identification code (CCDC)        | 1942672                                                                               |                 |
| Empirical formula                 | C <sub>79</sub> H <sub>79</sub> AsBCl <sub>4</sub> F <sub>15</sub> GaN <sub>4</sub> P |                 |
| Formula weight                    | 1697.68                                                                               |                 |
| Temperature                       | 100(2) K                                                                              |                 |
| Wavelength                        | 0.71073 Å                                                                             |                 |
| Crystal system                    | Triclinic                                                                             |                 |
| Space group                       | <i>P</i> -1                                                                           |                 |
| Unit cell dimensions              | a = 13.8673(2) Å                                                                      | α = 102.619(2)° |
|                                   | b = 14.4035(2) Å                                                                      | β = 96.156(2)°  |
|                                   | c = 21.4914(4) Å                                                                      | γ = 110.132(2)° |
| Volume                            | 3854.26(12) Å <sup>3</sup>                                                            |                 |
| Z                                 | 2                                                                                     |                 |
| Density (calculated)              | 1.463 Mg/m <sup>3</sup>                                                               |                 |
| Absorption coefficient            | 1.025 mm <sup>-1</sup>                                                                |                 |
| F(000)                            | 1736                                                                                  |                 |
| Crystal habitus                   | plate (orange)                                                                        |                 |
| Crystal size                      | 0.626 x 0.342 x 0.161 mm <sup>3</sup>                                                 |                 |
| Theta range for data collection   | 2.529 to 31.121°                                                                      |                 |
| Index ranges                      | -19 ≤ h ≤ 20, -20 ≤ k ≤ 20, -30 ≤ l ≤ 30                                              |                 |
| Reflections collected             | 177241                                                                                |                 |
| Independent reflections           | 21529 [R(int) = 0.0338]                                                               |                 |
| Completeness to theta = 25.242°   | 99.9 %                                                                                |                 |
| Max. and min. transmission        | 1.000 and 0.165                                                                       |                 |
| Data / restraints / parameters    | 21529 / 0 / 1022                                                                      |                 |
| Goodness-of-fit on F <sup>2</sup> | 1.050                                                                                 |                 |
| Final R indices [I > 2σ(I)]       | R1 = 0.0419, wR2 = 0.1129                                                             |                 |
| R indices (all data)              | R1 = 0.0494, wR2 = 0.1166                                                             |                 |
| Largest diff. peak and hole       | 2.650 and -1.151 e.Å <sup>-3</sup>                                                    |                 |

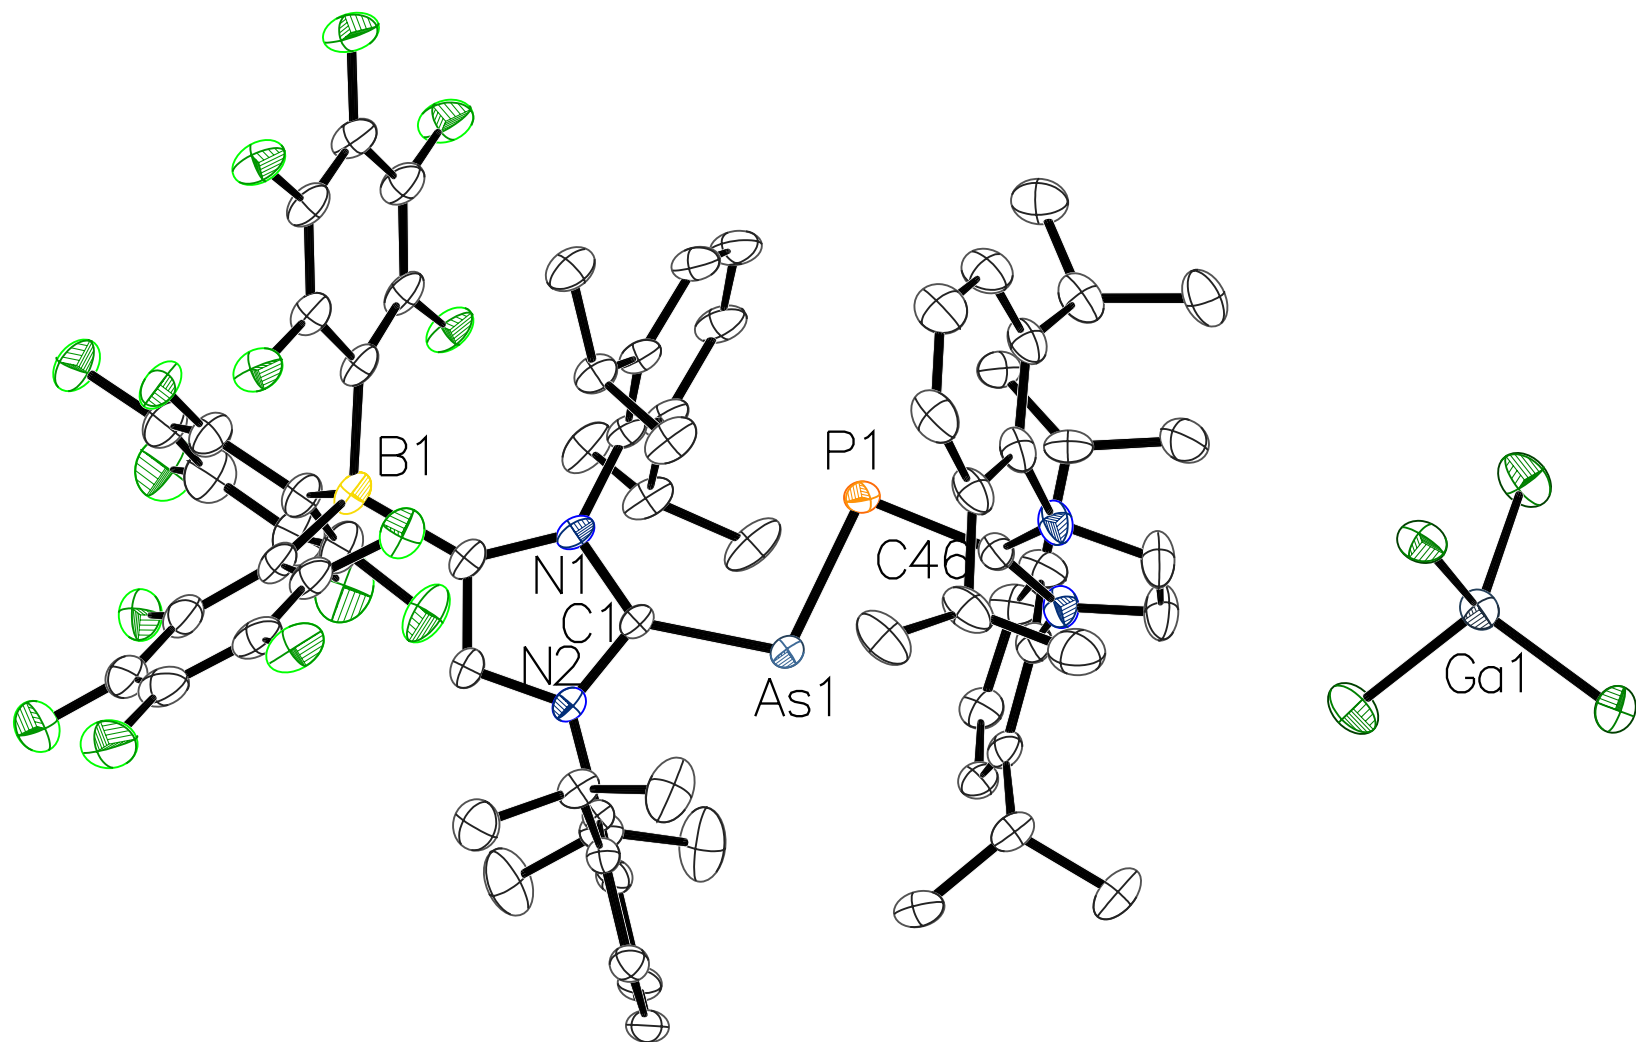

**Figure S4.** Molecular structure of [(WCA-IDipp)As=P(IDipp)][GaCl<sub>4</sub>] (**4b**); thermal ellipsoids are drawn at 50% probability. Hydrogen atoms and on co-crystallized toluene molecule are omitted for clarity.

**S3.5 [(WCA-IDipp)PP(IDipp)]\*****Table S5** Crystallographic data for compound **5a**.

| Compound                          | <b>5a</b>                                                                                        |                 |
|-----------------------------------|--------------------------------------------------------------------------------------------------|-----------------|
| Identification code (CCDC)        | 1942673                                                                                          |                 |
| Empirical formula                 | C <sub>74</sub> H <sub>75</sub> BF <sub>15</sub> N <sub>4</sub> O <sub>0.50</sub> P <sub>2</sub> |                 |
| Formula weight                    | 1386.13                                                                                          |                 |
| Temperature                       | 100(2) K                                                                                         |                 |
| Wavelength                        | 1.54184 Å                                                                                        |                 |
| Crystal system                    | Triclinic                                                                                        |                 |
| Space group                       | P-1                                                                                              |                 |
| Unit cell dimensions              | a = 12.5253(2) Å                                                                                 | α = 105.855(2)° |
|                                   | b = 15.4459(2) Å                                                                                 | β = 90.306(2)°  |
|                                   | c = 20.2657(2) Å                                                                                 | γ = 112.409(2)° |
| Volume                            | 3460.20(10) Å <sup>3</sup>                                                                       |                 |
| Z                                 | 2                                                                                                |                 |
| Density (calculated)              | 1.330 Mg/m <sup>3</sup>                                                                          |                 |
| Absorption coefficient            | 1.319 mm <sup>-1</sup>                                                                           |                 |
| F(000)                            | 1442                                                                                             |                 |
| Crystal habitus                   | irregular (red-green dichroic)                                                                   |                 |
| Crystal size                      | 0.298 x 0.252 x 0.147 mm <sup>3</sup>                                                            |                 |
| Theta range for data collection   | 2.284 to 77.620°                                                                                 |                 |
| Index ranges                      | -15 ≤ h ≤ 15, -19 ≤ k ≤ 19, -25 ≤ l ≤ 25                                                         |                 |
| Reflections collected             | 144778                                                                                           |                 |
| Independent reflections           | 14569 [R(int) = 0.0416]                                                                          |                 |
| Completeness to theta = 67.684°   | 100.0 %                                                                                          |                 |
| Max. and min. transmission        | 1.000 and 0.399                                                                                  |                 |
| Data / restraints / parameters    | 14569 / 66 / 908                                                                                 |                 |
| Goodness-of-fit on F <sup>2</sup> | 1.042                                                                                            |                 |
| Final R indices [I > 2σ(I)]       | R1 = 0.0466, wR2 = 0.1269                                                                        |                 |
| R indices (all data)              | R1 = 0.0487, wR2 = 0.1285                                                                        |                 |
| Largest diff. peak and hole       | 0.638 and -0.603 e.Å <sup>-3</sup>                                                               |                 |

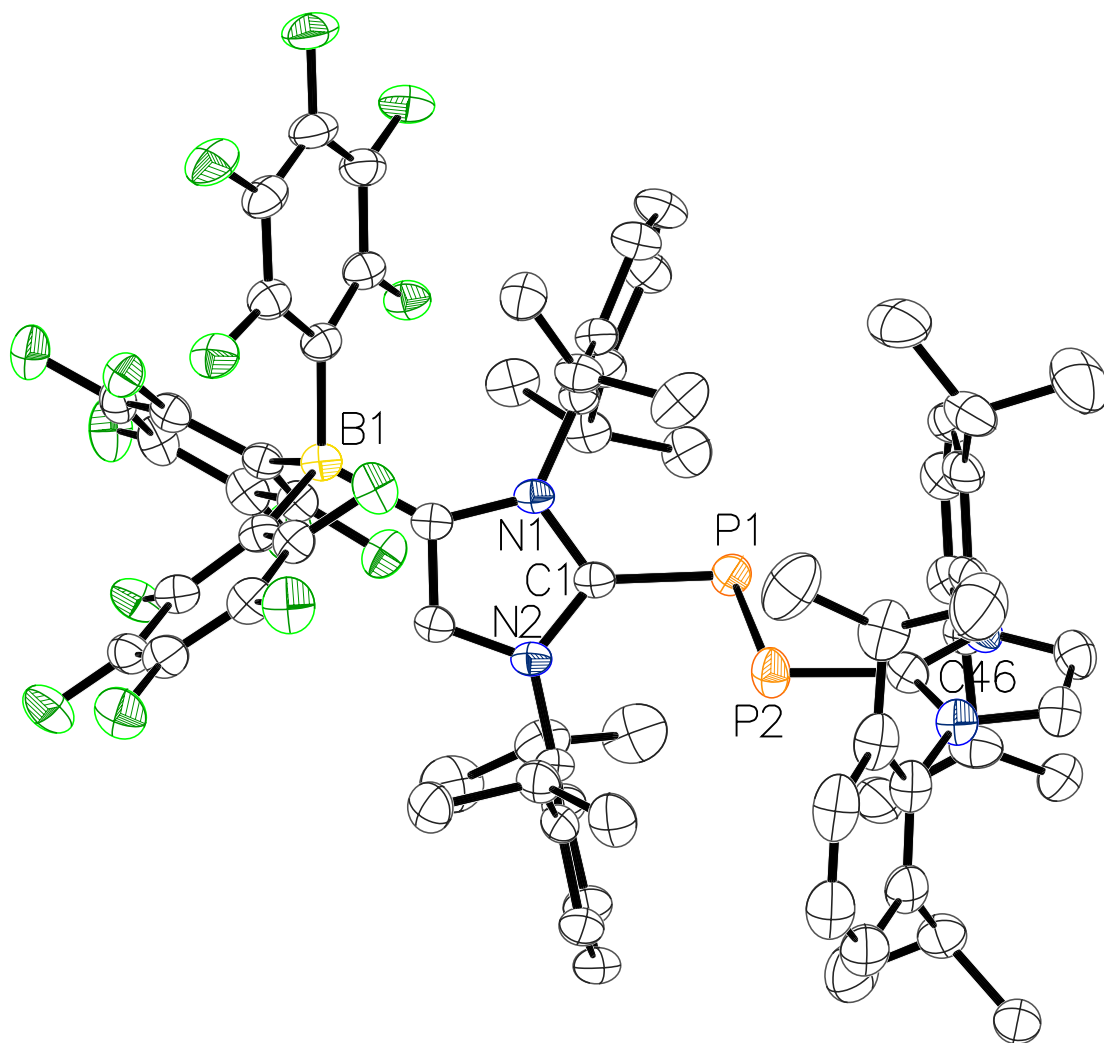

**Figure S5.** Molecular structure of  $[(\text{WCA-IDipp})\text{PP}(\text{IDipp})]^*$  (**5a**); thermal ellipsoids are drawn at 50% probability. Hydrogen atoms and one half co-crystallized thf molecule are omitted for clarity.



**S3.6 [(WCA-IDipp)AsP(IDipp)]\*****Table S6** Crystallographic data for compound **5b**.

|                                   |                                                                                           |                        |
|-----------------------------------|-------------------------------------------------------------------------------------------|------------------------|
| Compound                          | <b>5b</b>                                                                                 |                        |
| Identification code (CCDC)        | 1942674                                                                                   |                        |
| Empirical formula                 | C <sub>75</sub> H <sub>73.50</sub> AsBCl <sub>0.50</sub> F <sub>15</sub> N <sub>4</sub> P |                        |
| Formula weight                    | 1450.30                                                                                   |                        |
| Temperature                       | 100(2) K                                                                                  |                        |
| Wavelength                        | 1.54184 Å                                                                                 |                        |
| Crystal system                    | Triclinic                                                                                 |                        |
| Space group                       | <i>P</i> -1                                                                               |                        |
| Unit cell dimensions              | a = 12.4926(8) Å                                                                          | $\alpha$ = 105.543(4)° |
|                                   | b = 15.7024(10) Å                                                                         | $\beta$ = 90.831(4)°   |
|                                   | c = 20.2821(8) Å                                                                          | $\gamma$ = 112.950(6)° |
| Volume                            | 3497.8(4) Å <sup>3</sup>                                                                  |                        |
| Z                                 | 2                                                                                         |                        |
| Density (calculated)              | 1.377 Mg/m <sup>3</sup>                                                                   |                        |
| Absorption coefficient            | 1.789 mm <sup>-1</sup>                                                                    |                        |
| F(000)                            | 1496                                                                                      |                        |
| Crystal habitus                   | needle (green)                                                                            |                        |
| Crystal size                      | 0.175 x 0.041 x 0.032 mm <sup>3</sup>                                                     |                        |
| Theta range for data collection   | 2.282 to 766.600°                                                                         |                        |
| Index ranges                      | -14 ≤ h ≤ 14, -18 ≤ k ≤ 18, -18 ≤ l ≤ 24                                                  |                        |
| Reflections collected             | 36387                                                                                     |                        |
| Independent reflections           | 12081 [R(int) = 0.0677]                                                                   |                        |
| Completeness to theta = 67.684°   | 99.3 %                                                                                    |                        |
| Max. and min. transmission        | 1.000 and 0.699                                                                           |                        |
| Data / restraints / parameters    | 12081 / 161 / 926                                                                         |                        |
| Goodness-of-fit on F <sup>2</sup> | 1.035                                                                                     |                        |
| Final R indices [I > 2σ(I)]       | R1 = 0.0675, wR2 = 0.1768                                                                 |                        |
| R indices (all data)              | R1 = 0.0938, wR2 = 0.1970                                                                 |                        |
| Largest diff. peak and hole       | 1.391 and -0.622 e.Å <sup>-3</sup>                                                        |                        |

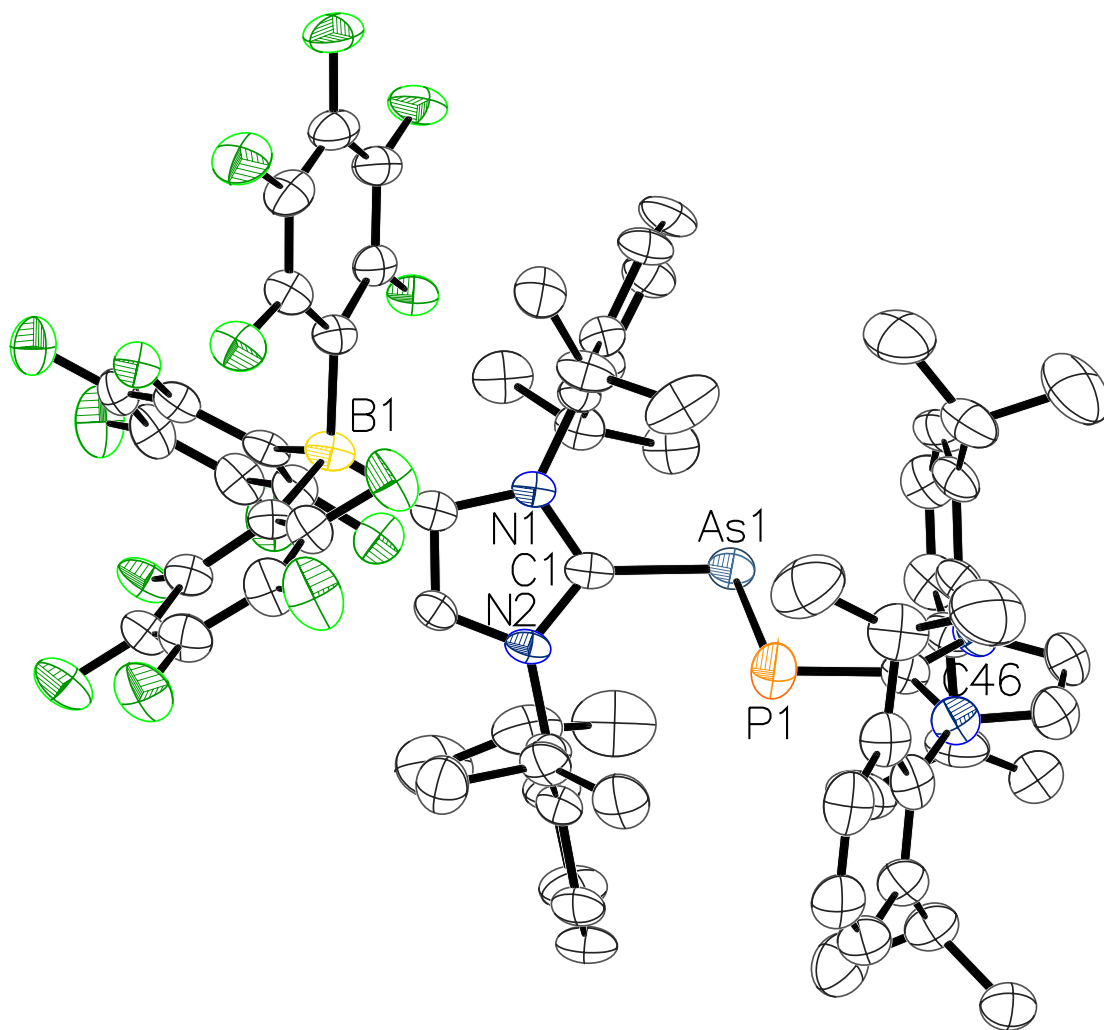

**Figure S6.** Molecular structure of  $[(\text{WCA-IDipp})\text{As}=\text{P}(\text{IDipp})]^+$  (**5b**); thermal ellipsoids are drawn at 50% probability. Hydrogen atoms and one half co-crystallized chlorobenzene molecule are omitted for clarity.

S4  $^1\text{H}$ ,  $^{13}\text{C}$ ,  $^{11}\text{B}$ ,  $^{19}\text{F}$  and  $^{31}\text{P}$  NMR spectra

S4.1 (WCA-IDipp)P(Cl)P(IDipp) (**3a**)

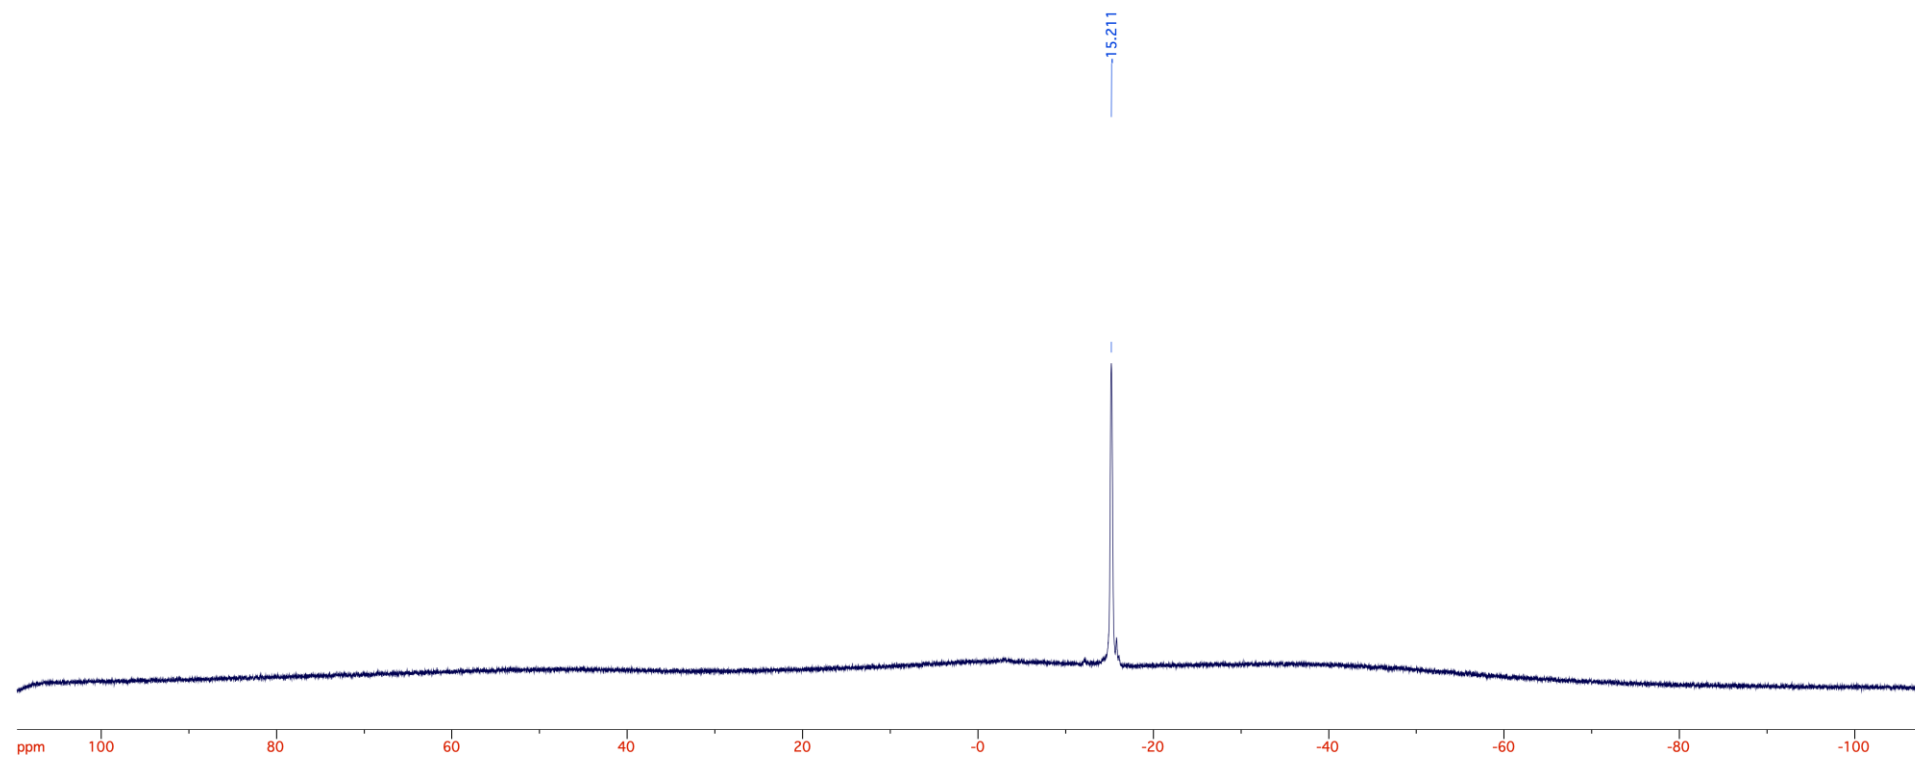

Figure S7.  $^{11}\text{B}$  NMR spectrum (96 MHz,  $\text{THF-}d_8$ , 278 K) of (WCA-IDipp)P(Cl)P(IDipp) (**3a**).

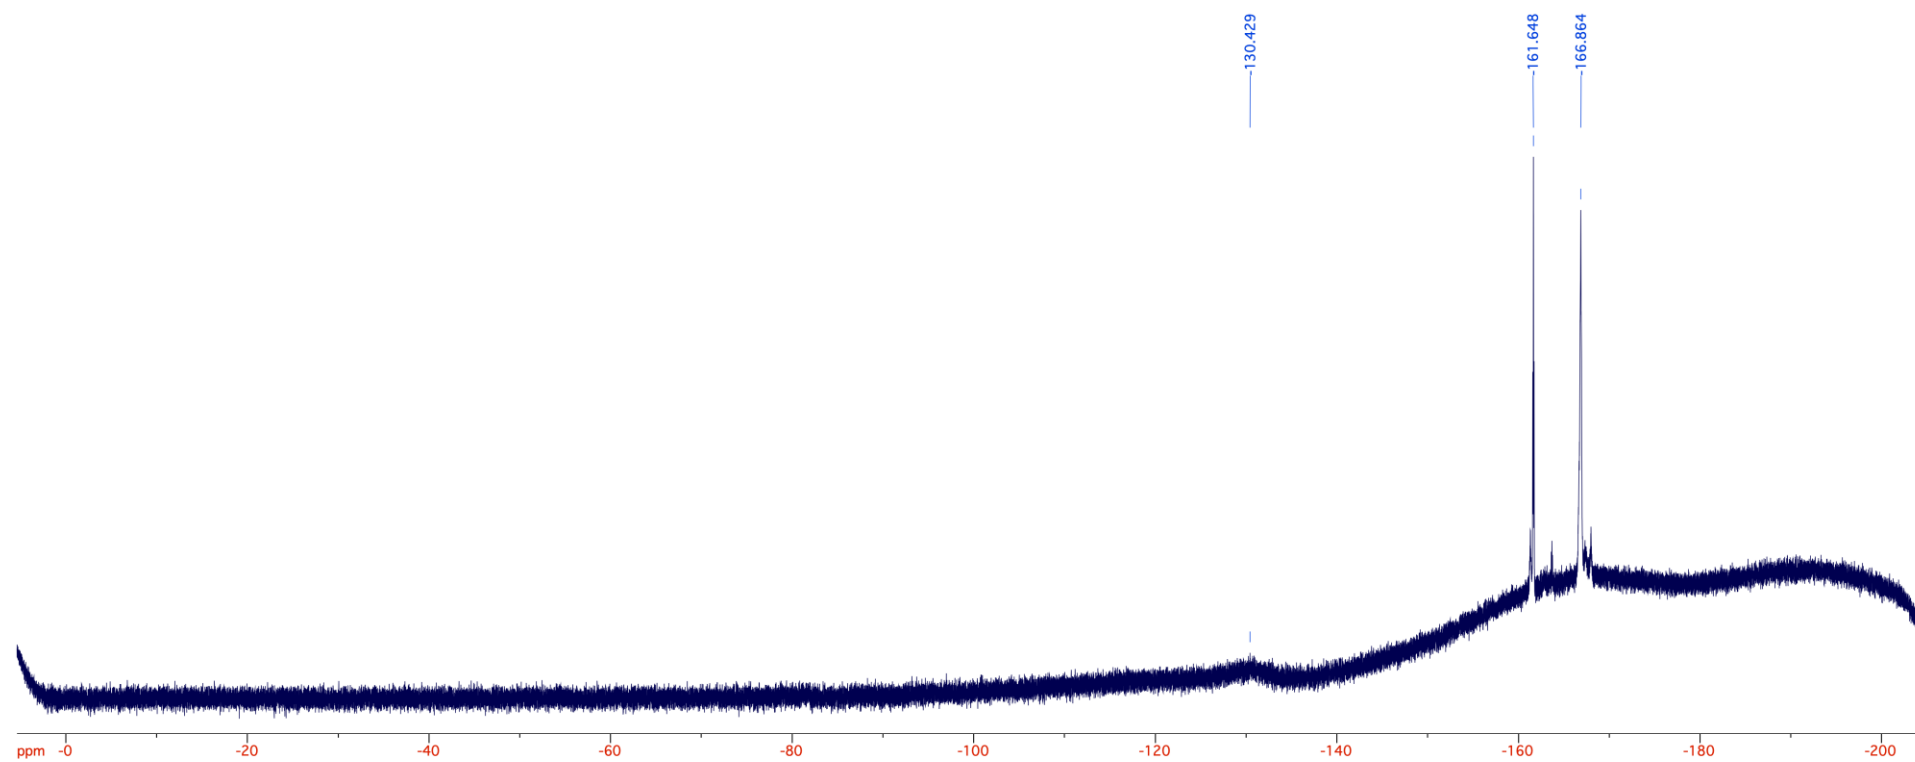

**Figure S8.**  $^{19}\text{F}$  NMR spectrum (282 MHz,  $\text{THF-}d_8$ , 278 K) of (WCA-IDipp)P(Cl)P(IDipp) (**3a**).

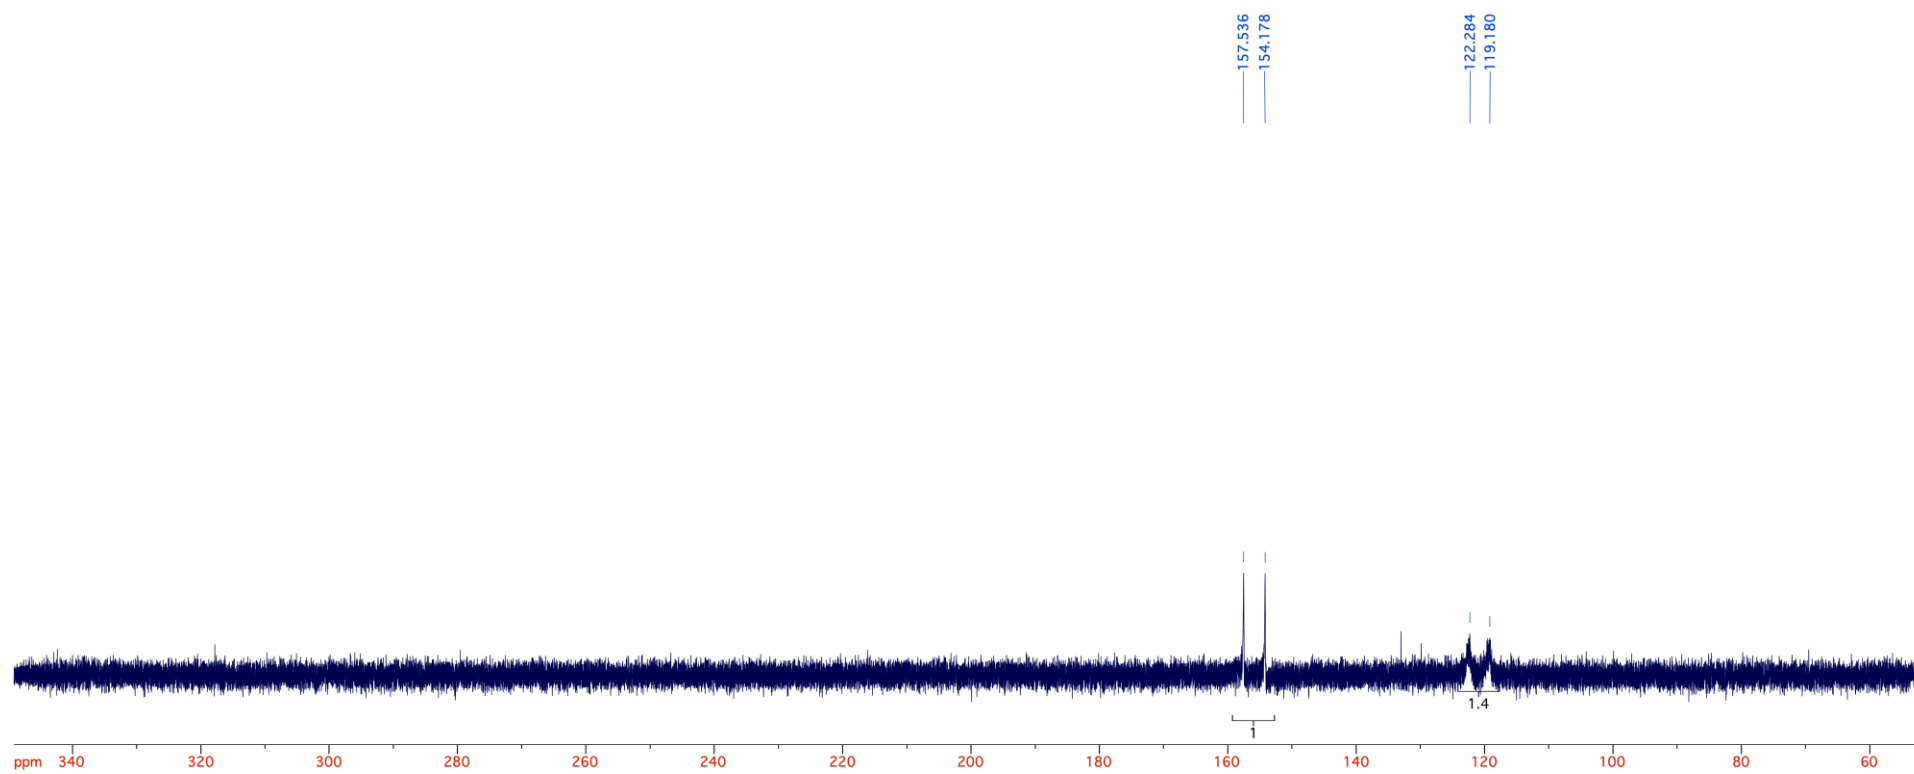

**Figure S9.**  $^{31}\text{P}$  NMR spectrum (122 MHz,  $\text{THF-}d_8$ , 278 K) of (WCA-IDipp)P(Cl)P(IDipp) (**3a**).

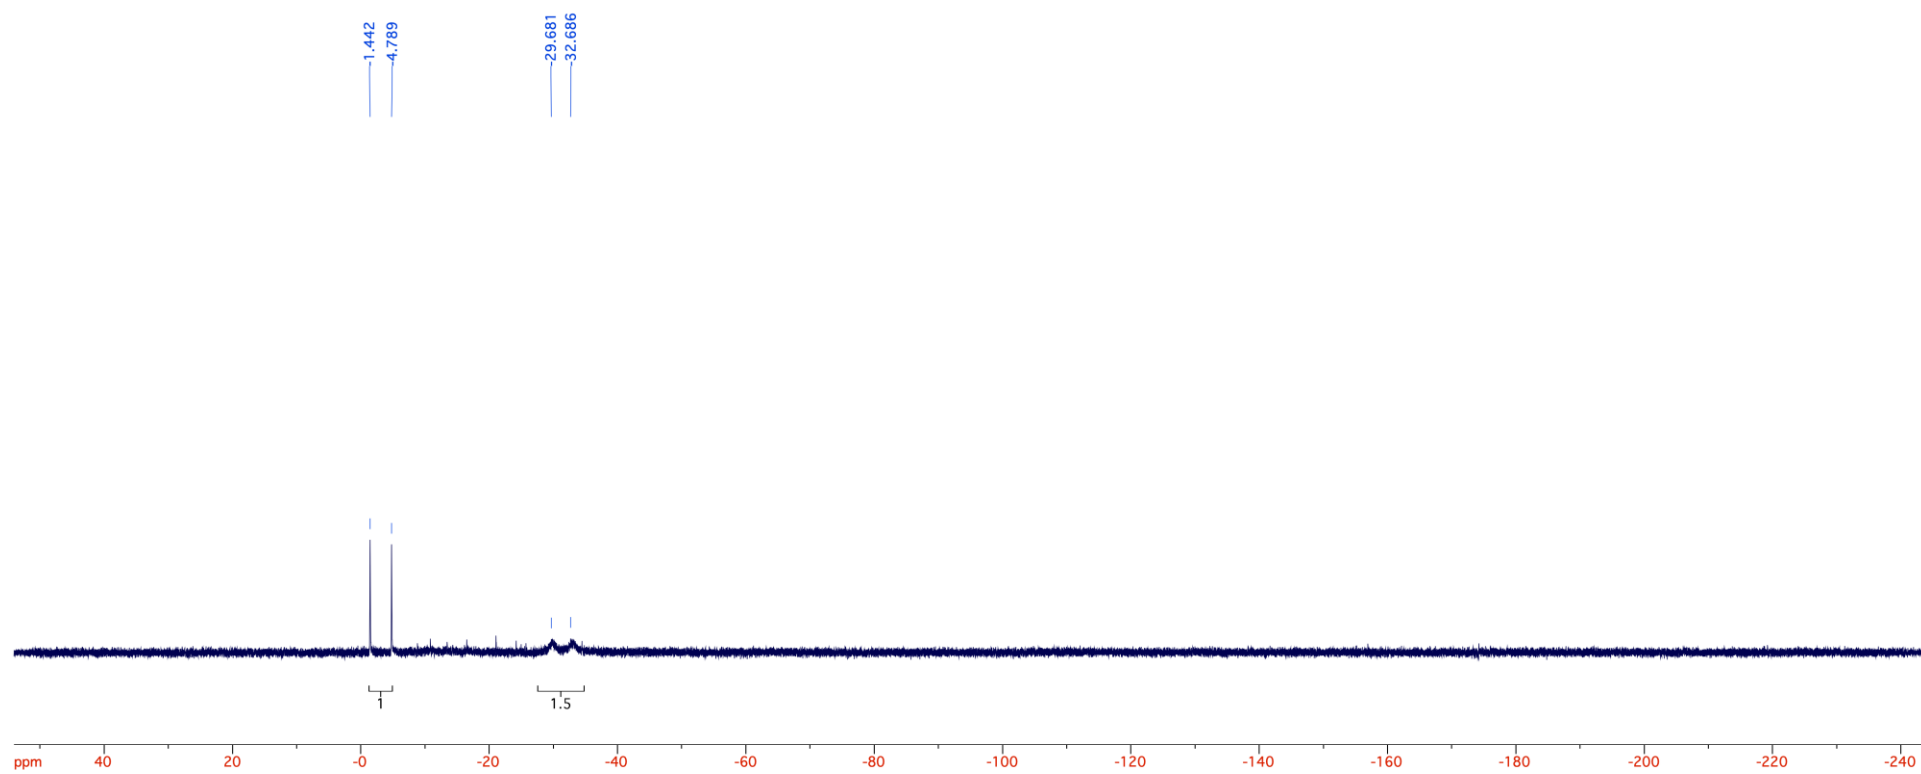

**Figure S10.**  $^{31}\text{P}$  NMR spectrum (122 MHz,  $\text{THF-}d_8$ , 278 K) of  $(\text{WCA-IDipp})\text{P}(\text{Cl})\text{P}(\text{IDipp})$  (**3a**).

S4.2 (WCA-IDipp)As(Cl)P(IDipp) (3b)

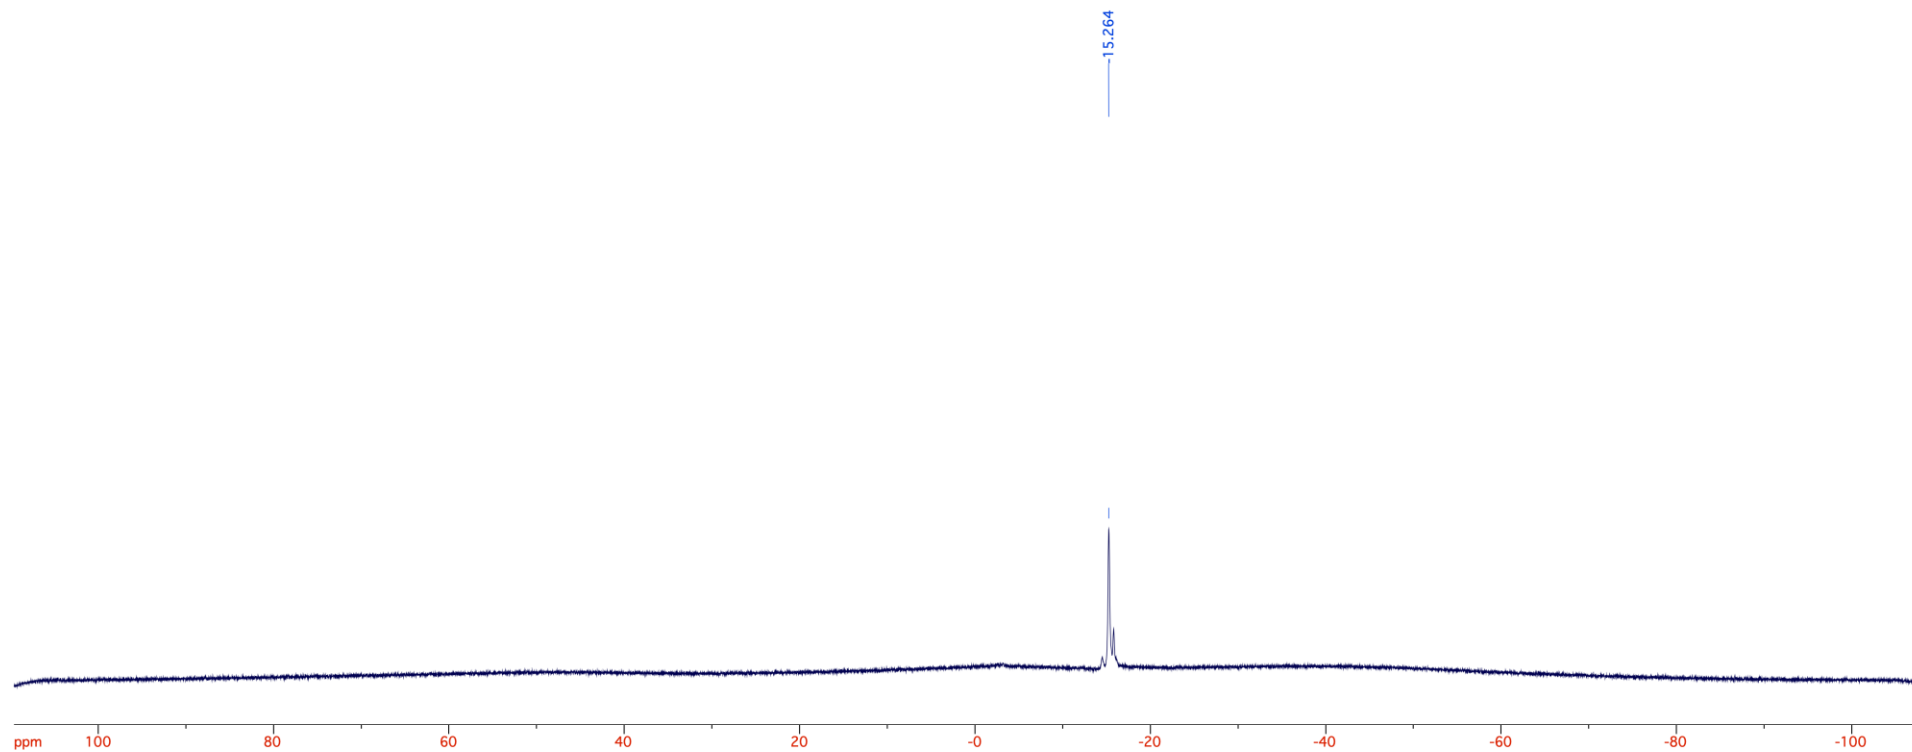

Figure S11.  $^{11}\text{B}$  NMR spectrum (96 MHz,  $\text{THF-}d_8$ , 278 K) of (WCA-IDipp)As(Cl)P(IDipp) (3b).

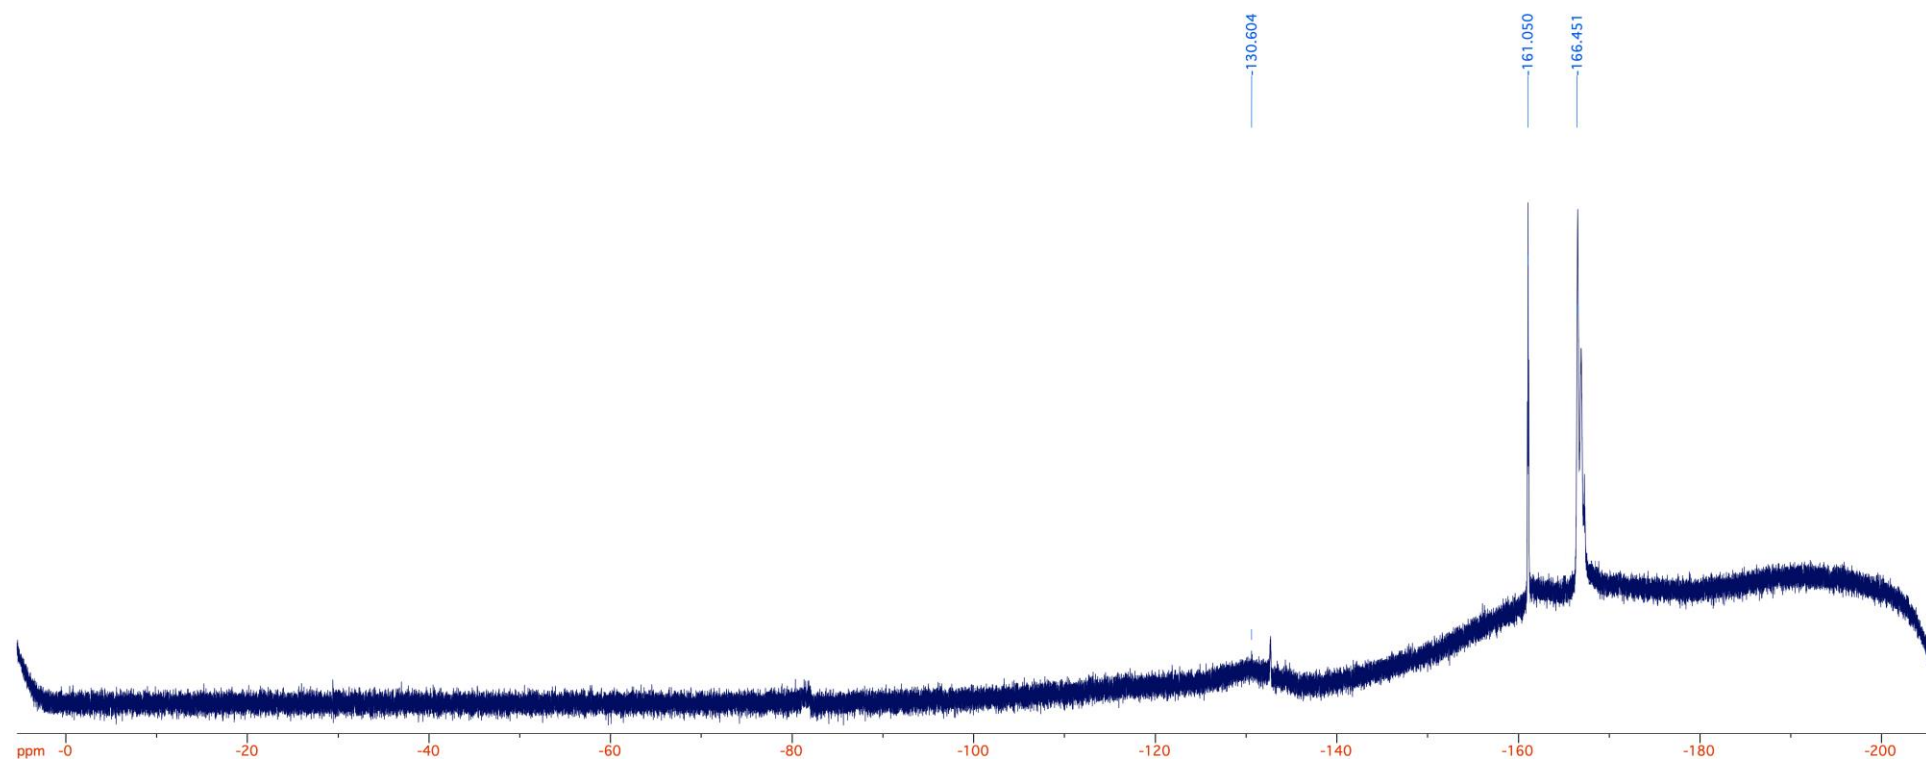

**Figure S12.**  $^{19}\text{F}$  NMR spectrum (282 MHz,  $\text{THF-}d_8$ , 278 K) of  $(\text{WCA-IDipp})\text{As}(\text{Cl})\text{P}(\text{IDipp})$  (**3b**).



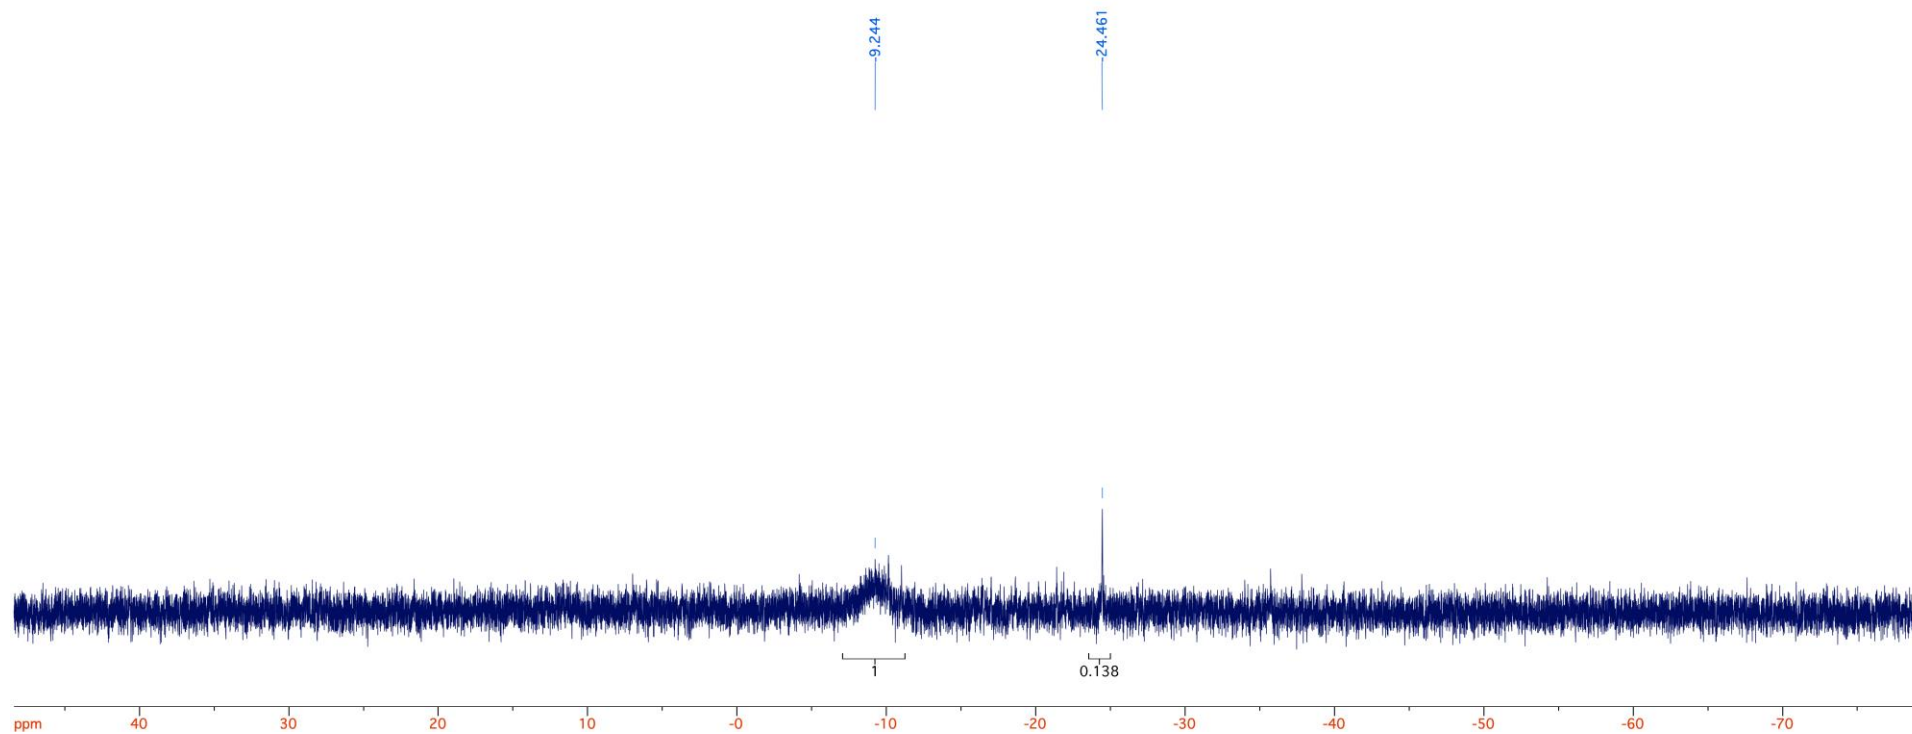

**Figure S13.**  $^{31}\text{P}$  NMR spectrum (122 MHz,  $\text{THF-}d_8$ , 278 K) of  $(\text{WCA-IDipp})\text{As}(\text{Cl})\text{P}(\text{IDipp})$  (**3b**).

### S4.3 [(WCA-IDipp)P=P(IDipp)][GaCl<sub>4</sub>] (4a)

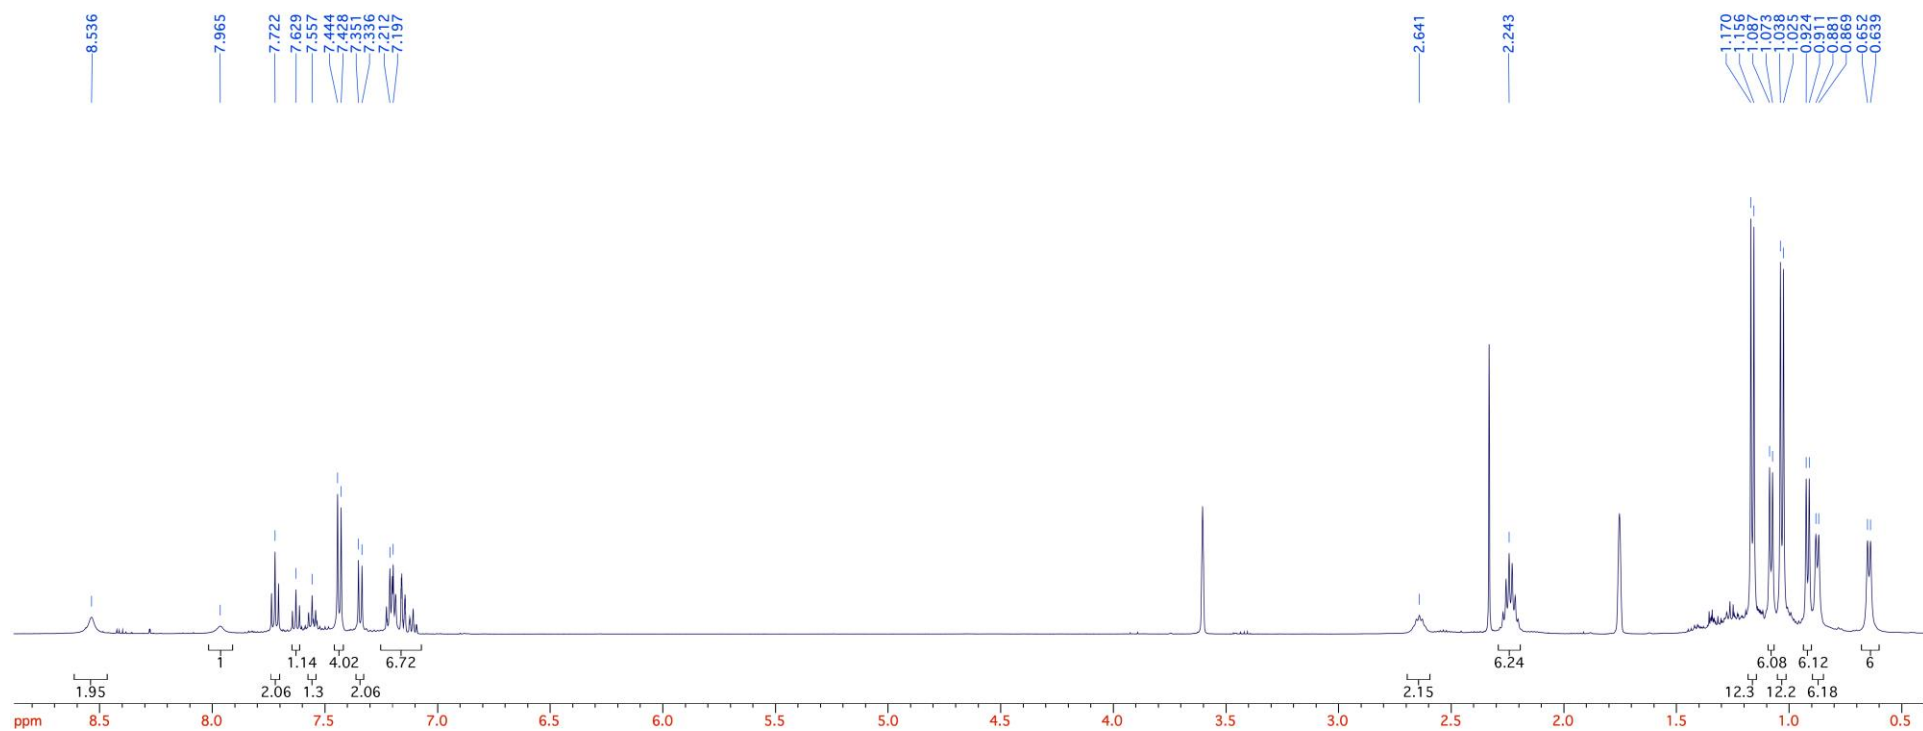

Figure S14. <sup>1</sup>H NMR spectrum (500 MHz, THF-d<sub>8</sub>, 278 K) of [(WCA-IDipp)P=P(IDipp)][GaCl<sub>4</sub>] (4a).

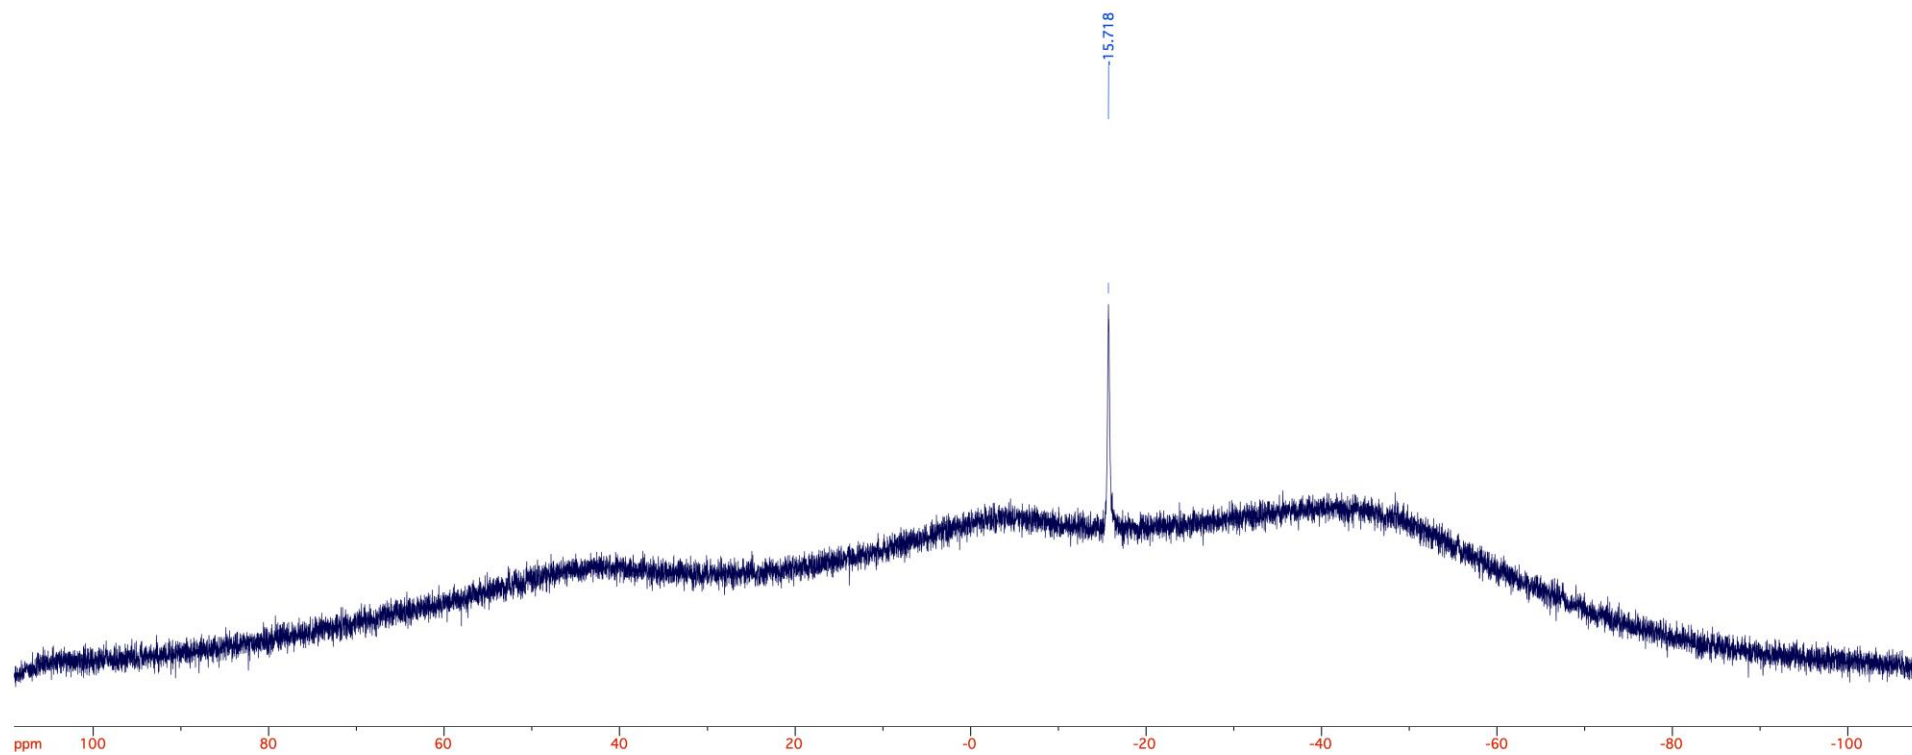

**Figure S15.**  $^{11}\text{B}$  NMR spectrum (96 MHz,  $\text{THF-}d_8$ , 278 K) of  $[(\text{WCA-IDipp})\text{P}=\text{P}(\text{IDipp})][\text{GaCl}_4]$  (**4a**).

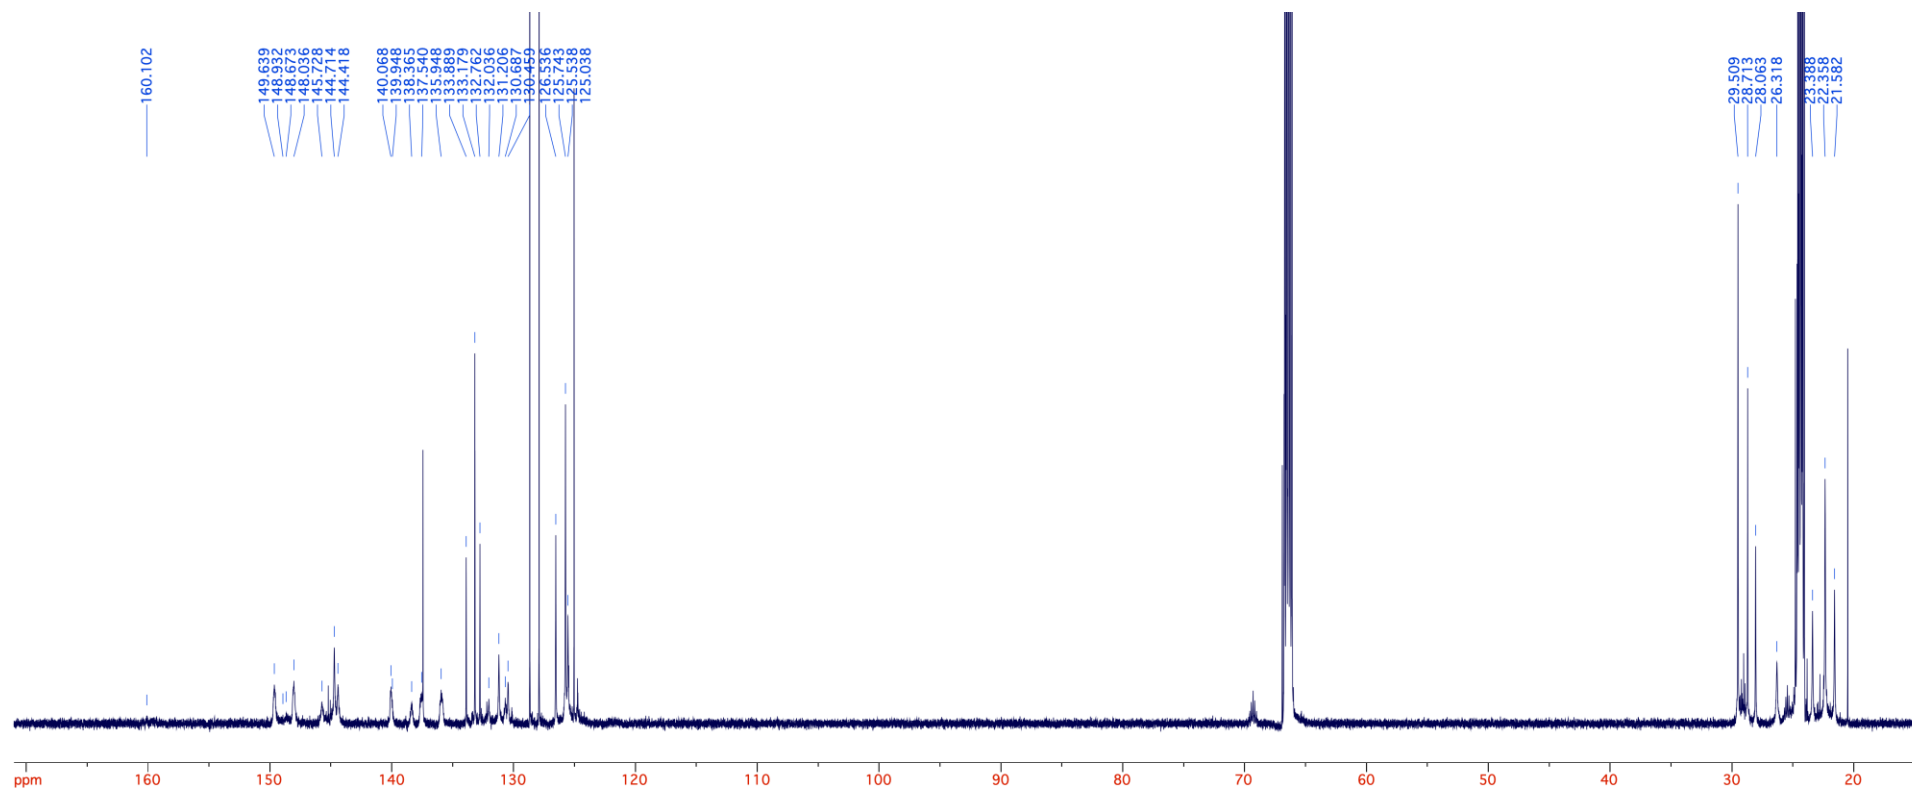

Figure S16.  $^{13}\text{C}$  NMR spectrum (151 MHz,  $\text{THF-}d_8$ , 278 K) of  $[(\text{WCA-IDipp})\text{P}=\text{P}(\text{IDipp})][\text{GaCl}_4]$  (**4a**).

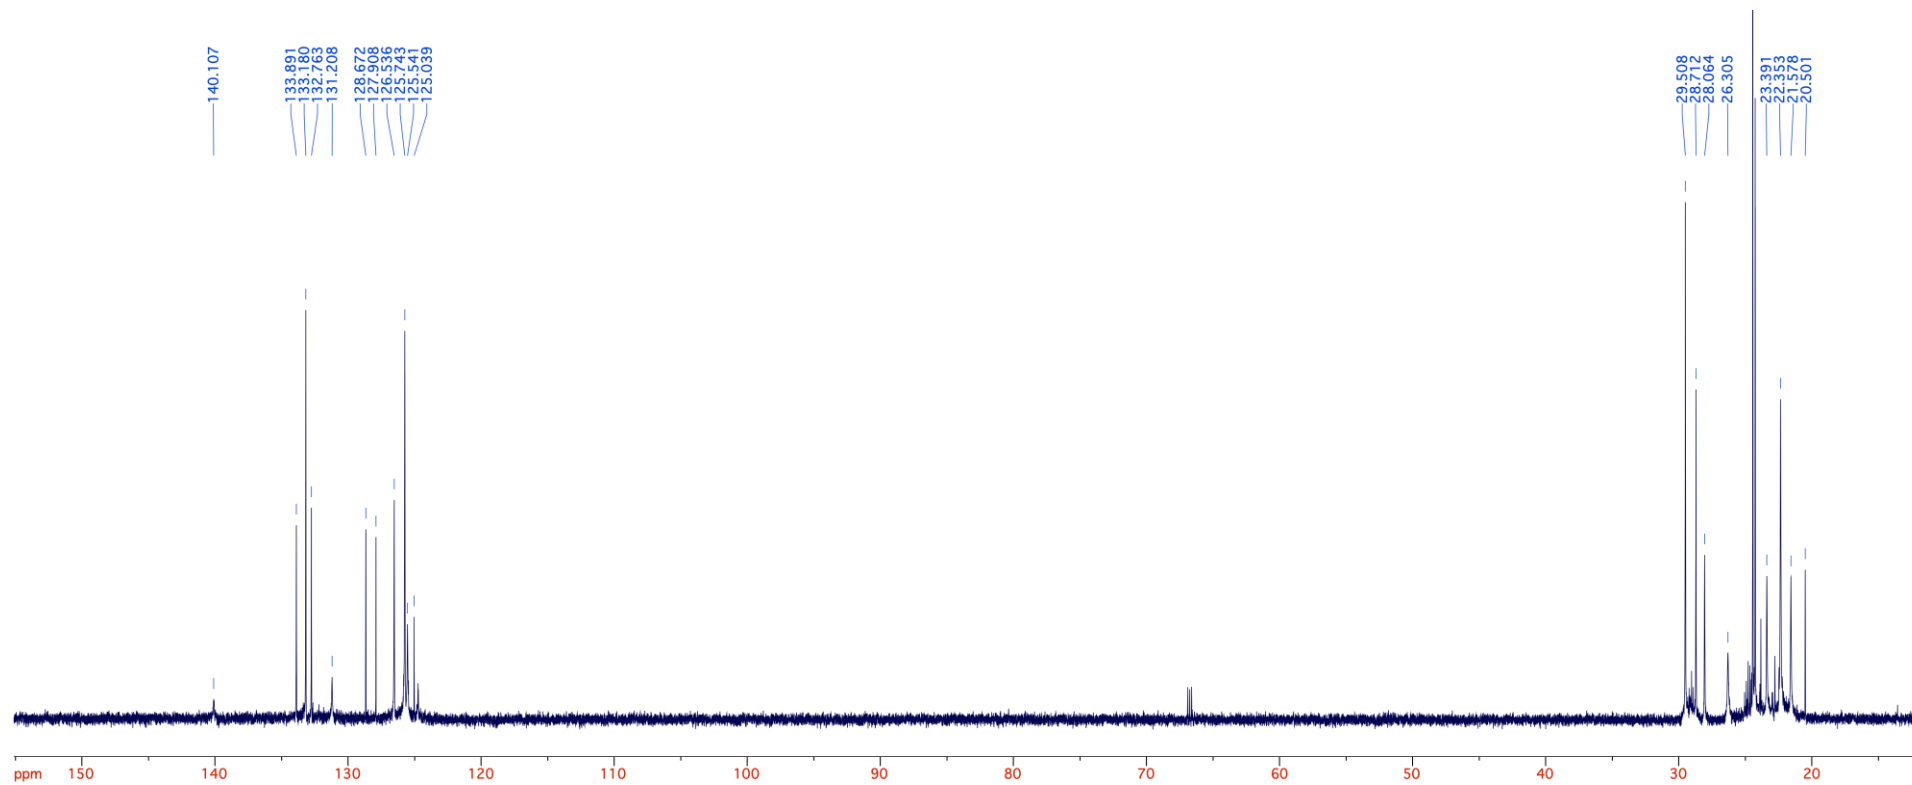

**Figure S17.**  $^{13}\text{C}$  DEPT135 NMR spectrum (151 MHz,  $\text{THF-}d_8$ , 278 K) of  $[(\text{WCA-IDipp})\text{P}=\text{P}(\text{IDipp})][\text{GaCl}_4]$  (**4a**).

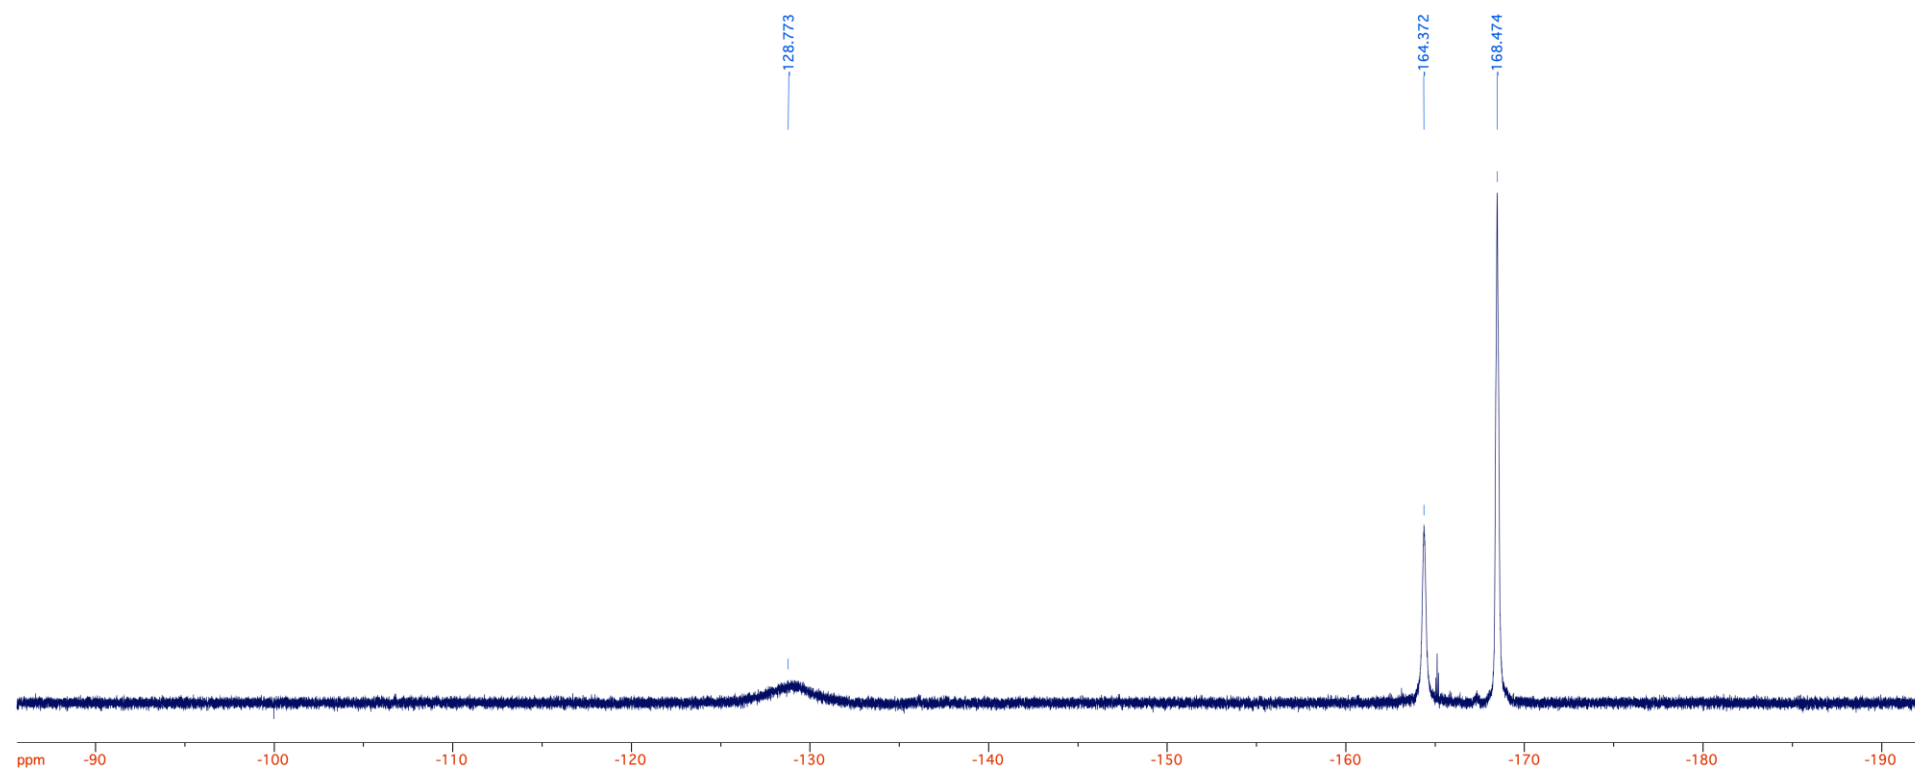

**Figure S18.**  $^{19}\text{F}$  NMR spectrum (282 MHz,  $\text{THF-}d_6$ , 278 K) of  $[(\text{WCA-IDipp})\text{P}=\text{P}(\text{IDipp})][\text{GaCl}_4]$  (**4a**).

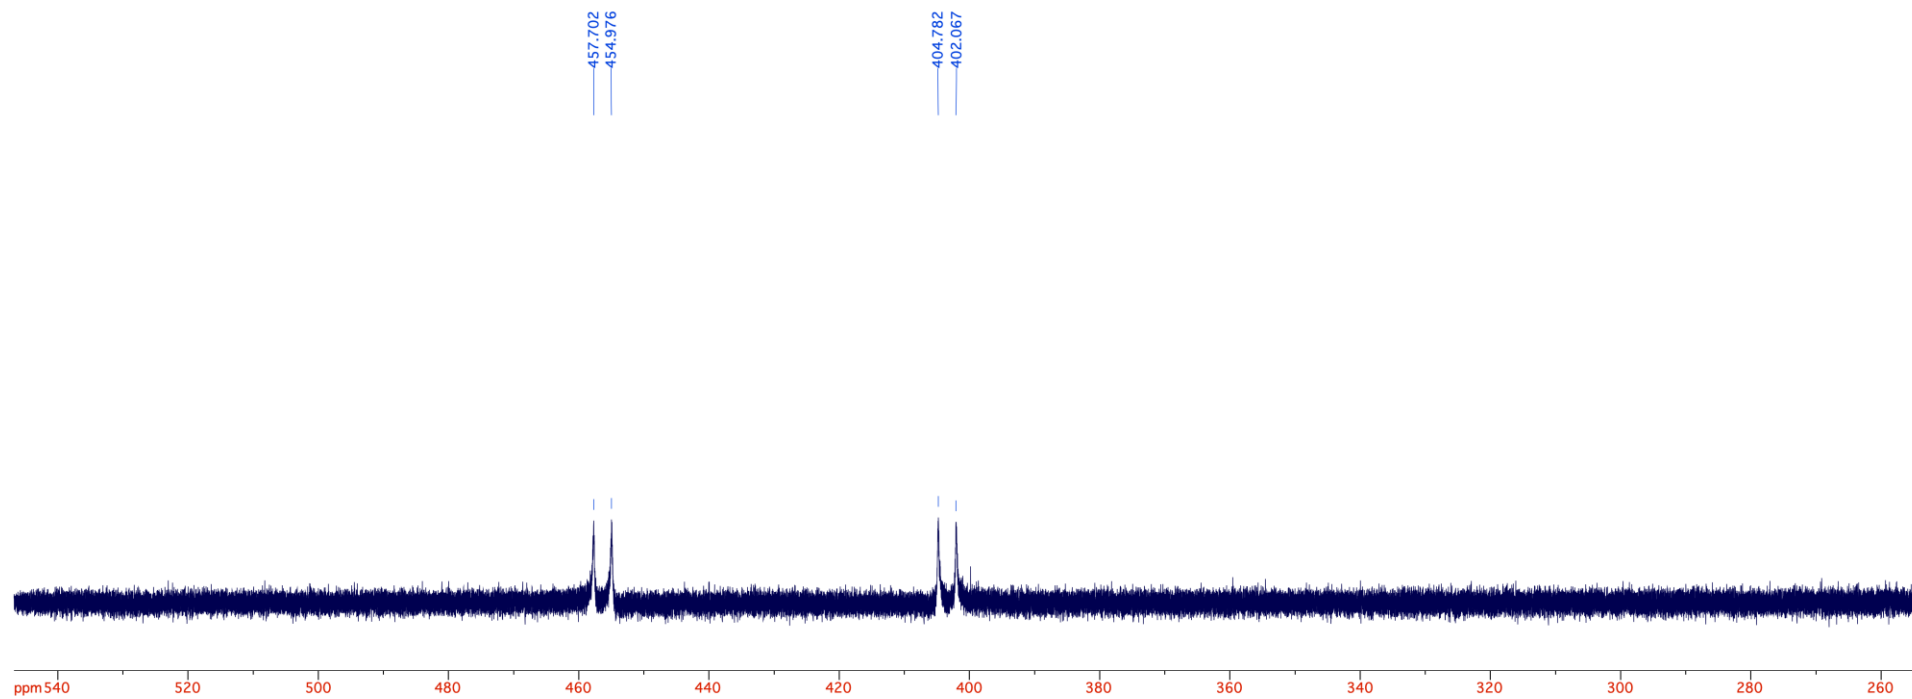

**Figure S19.**  $^{31}\text{P}$  NMR spectrum (122 MHz,  $\text{THF-}d_8$ , 278 K) of  $[(\text{WCA-IDipp})\text{P}=\text{P}(\text{IDipp})][\text{GaCl}_4]$  (**4a**).

### S4.3 [(WCA-IDipp)As=P(IDipp)][GaCl<sub>4</sub>] (4b)

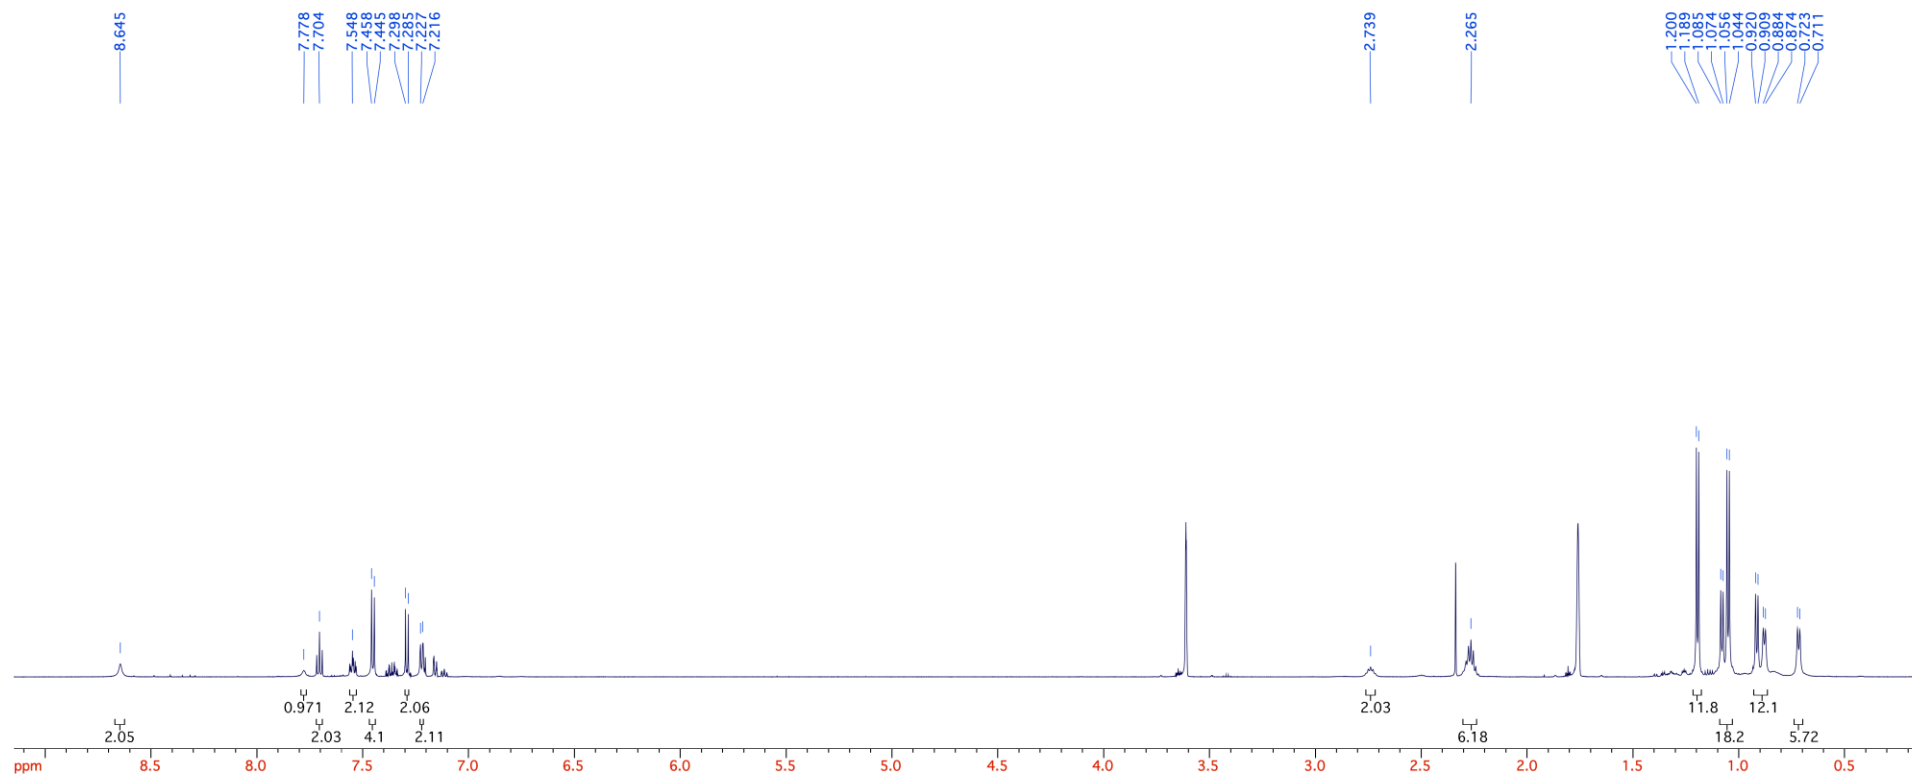

Figure S20. <sup>1</sup>H NMR spectrum (500 MHz, THF-d<sub>8</sub>, 278 K) of [(WCA-IDipp)As=P(IDipp)][GaCl<sub>4</sub>] (4b).



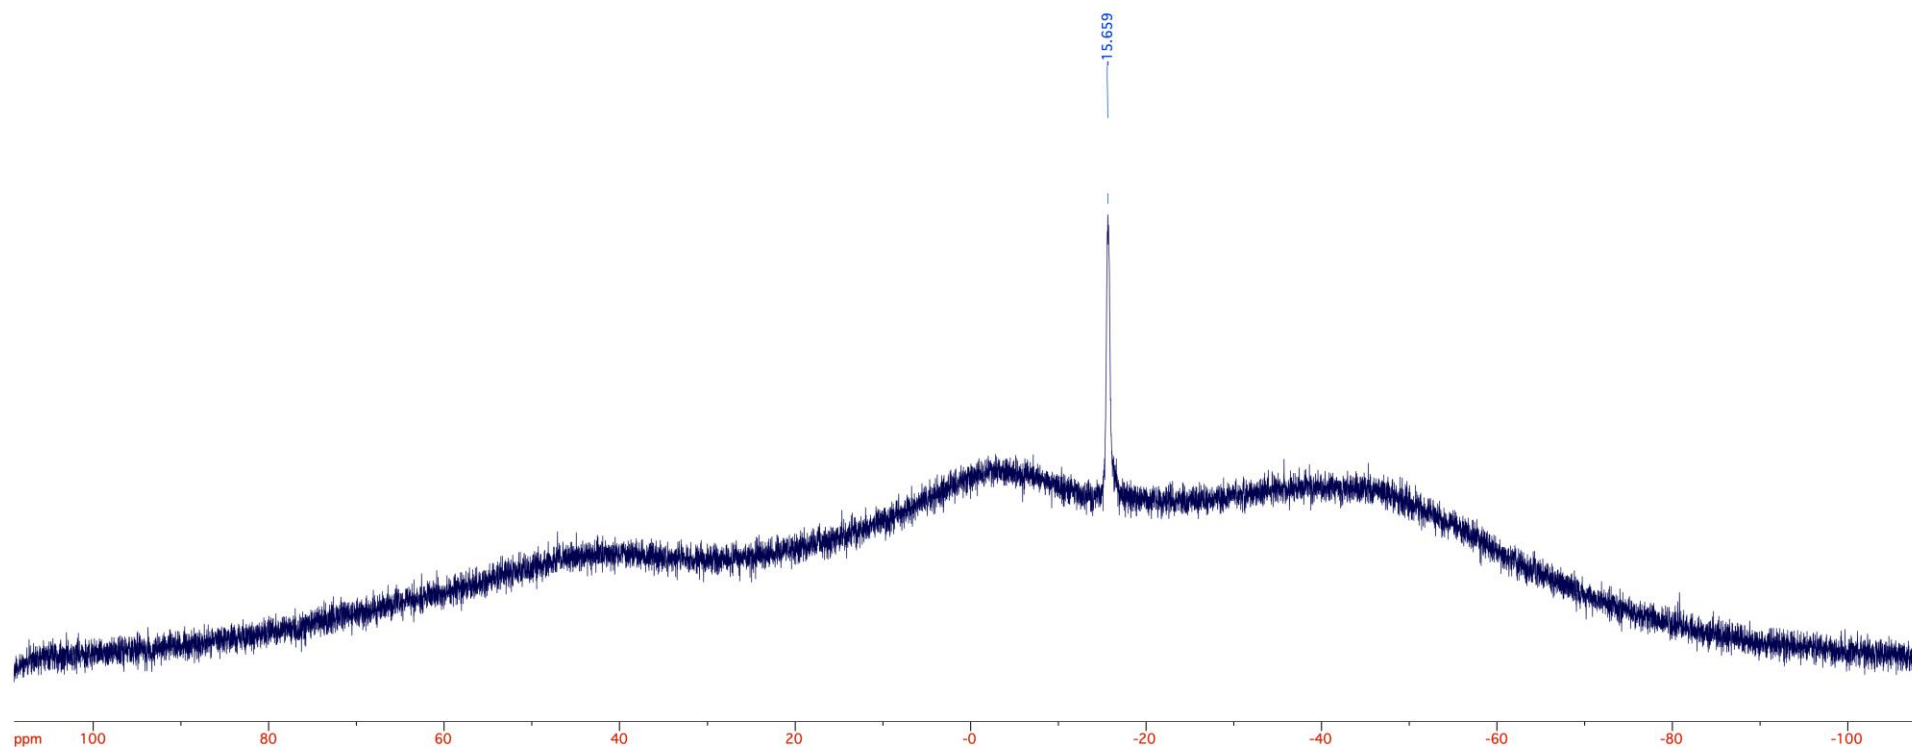

**Figure S21.**  $^{11}\text{B}$  NMR spectrum (96 MHz,  $\text{THF-}d_8$ , 278 K) of  $[(\text{WCA-IDipp})\text{As}=\text{P}(\text{IDipp})][\text{GaCl}_4]$  (**4b**).

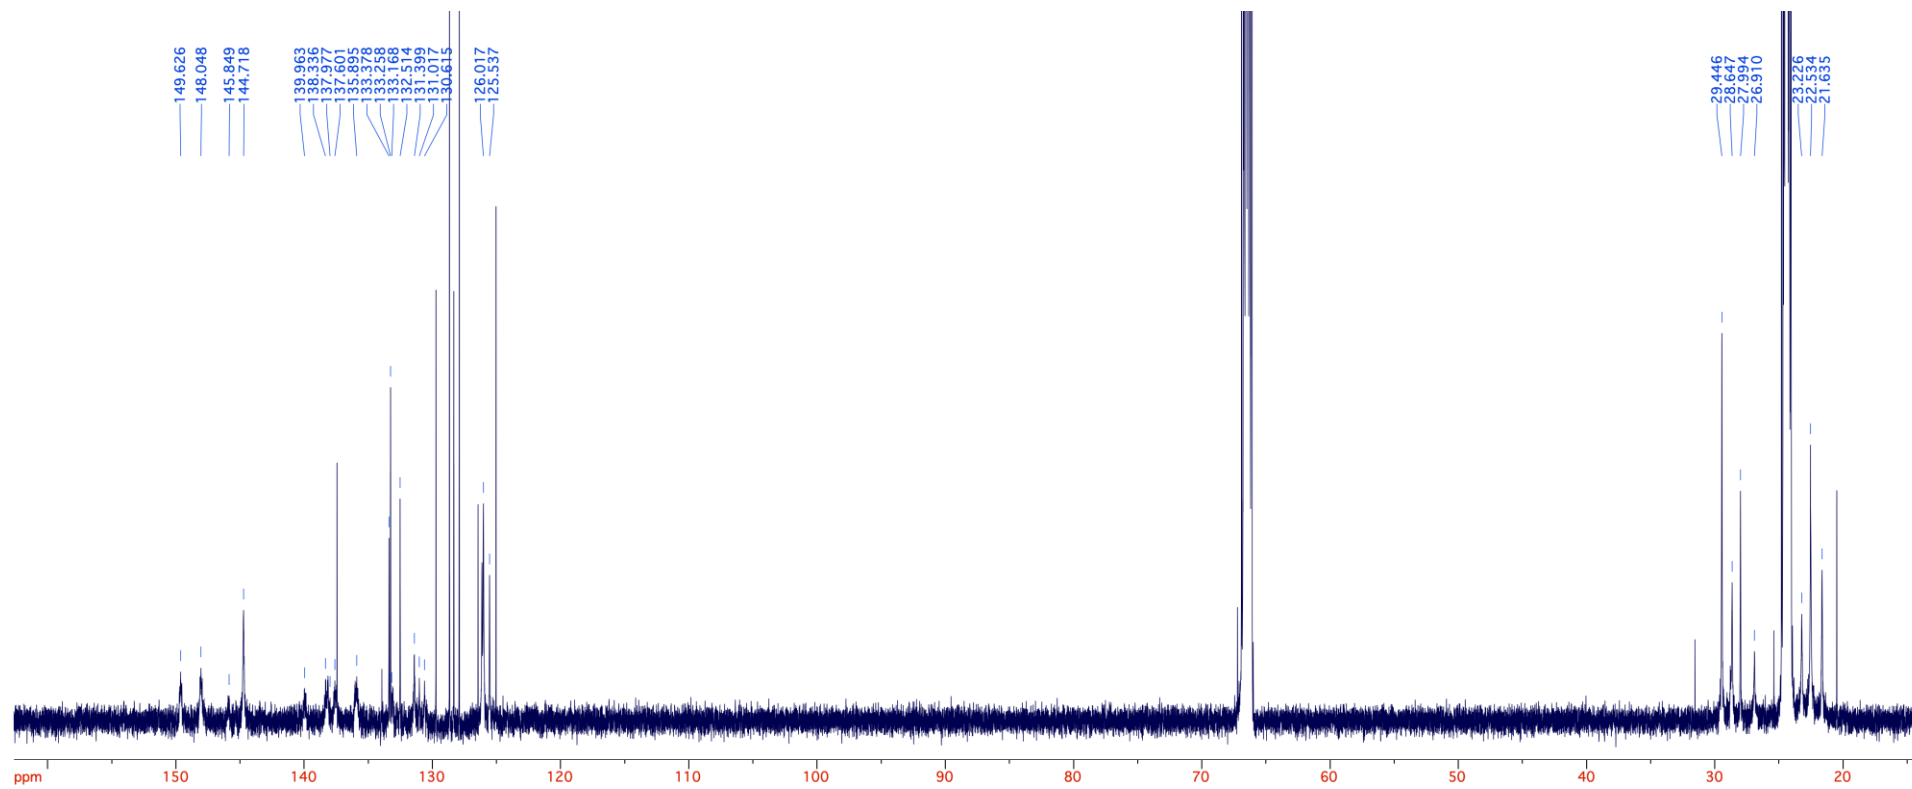

Figure S22.  $^{13}\text{C}$  NMR spectrum (151 MHz,  $\text{THF-d}_8$ , 278 K) of  $[(\text{WCA-IDipp})\text{As}=\text{P}(\text{IDipp})][\text{GaCl}_4]$  (**4b**).

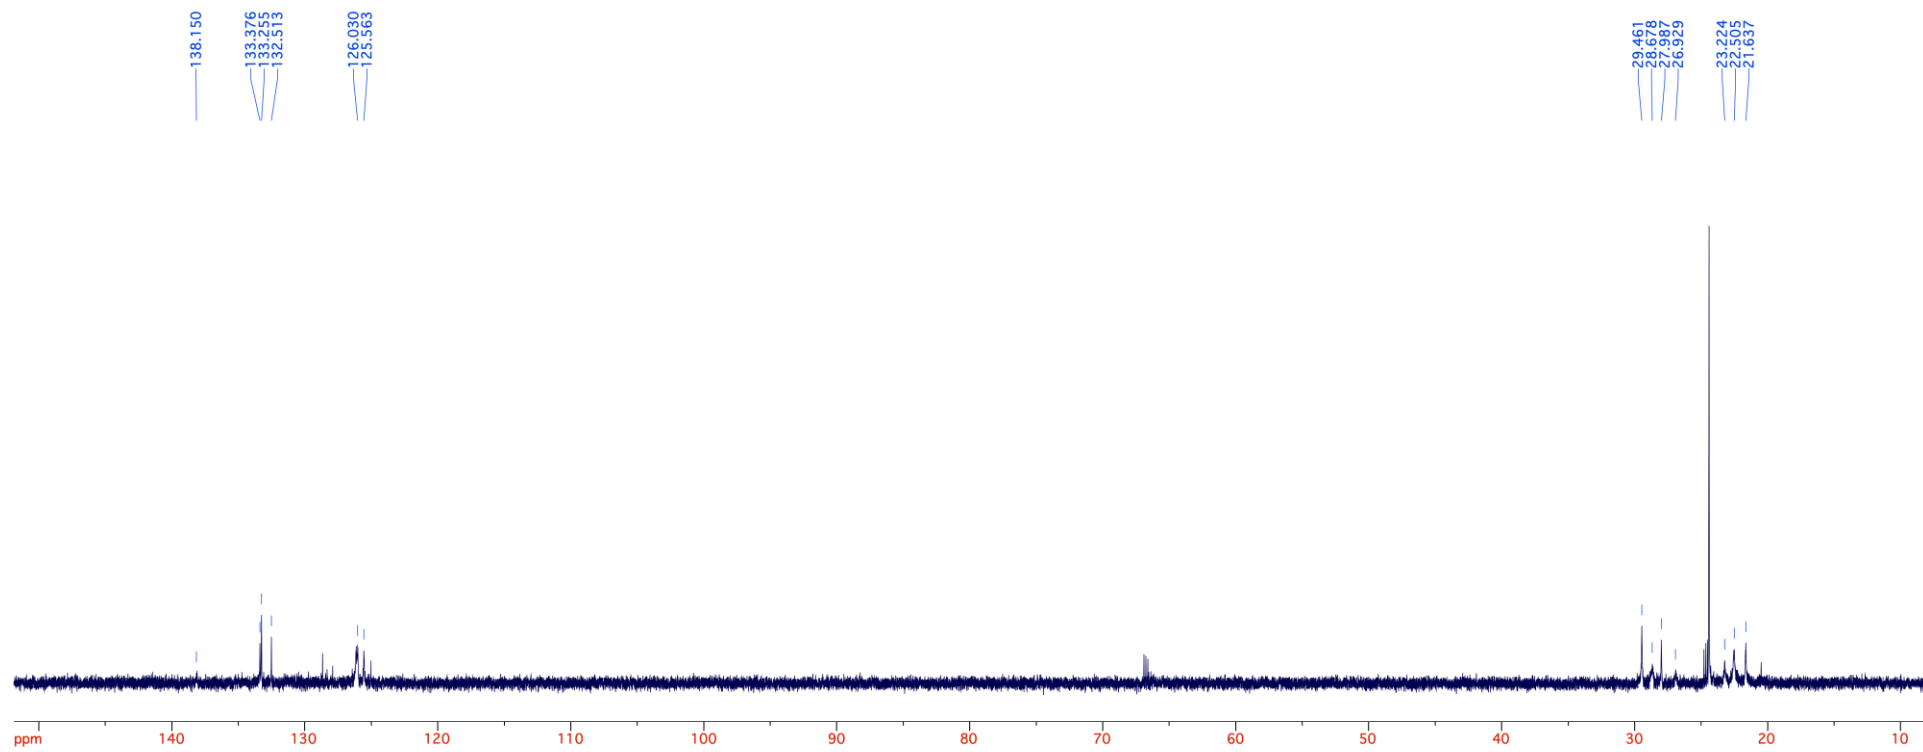

**Figure S23.**  $^{13}\text{C}$  DEPT135 NMR spectrum (151 MHz,  $\text{THF-}d_8$ , 278 K) of  $[(\text{WCA-IDipp})\text{As}=\text{P}(\text{IDipp})][\text{GaCl}_4]$  (**4b**).

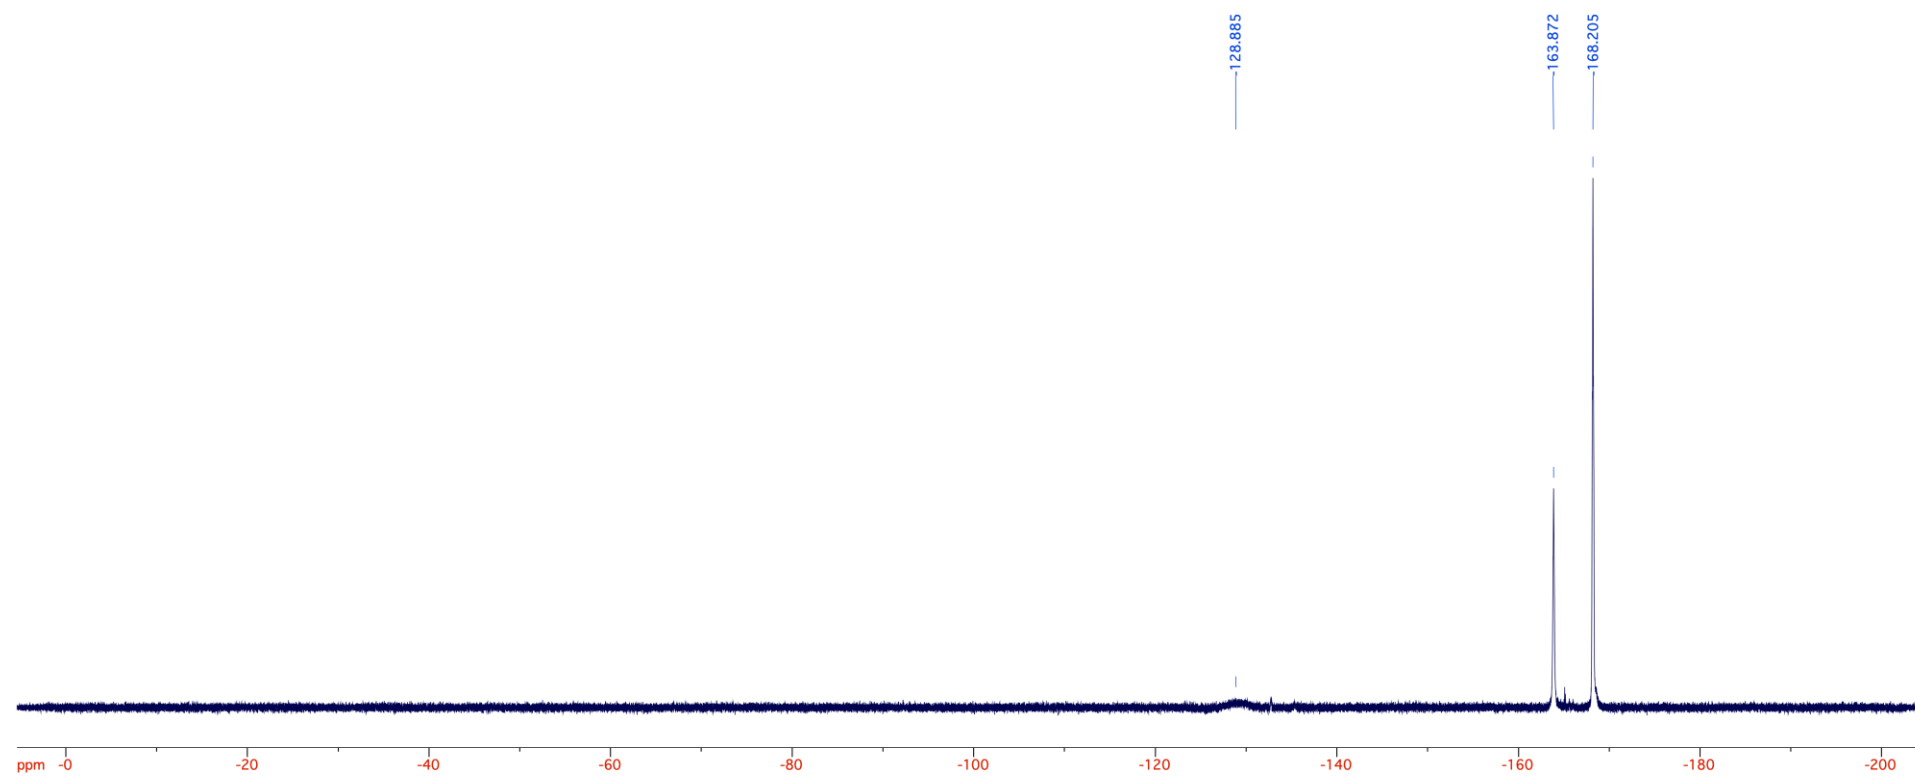

**Figure S24.**  $^{19}\text{F}$  NMR spectrum (282 MHz,  $\text{THF-}d_8$ , 278 K) of  $[(\text{WCA-IDipp})\text{As}=\text{P}(\text{IDipp})][\text{GaCl}_4]$  (**4b**).

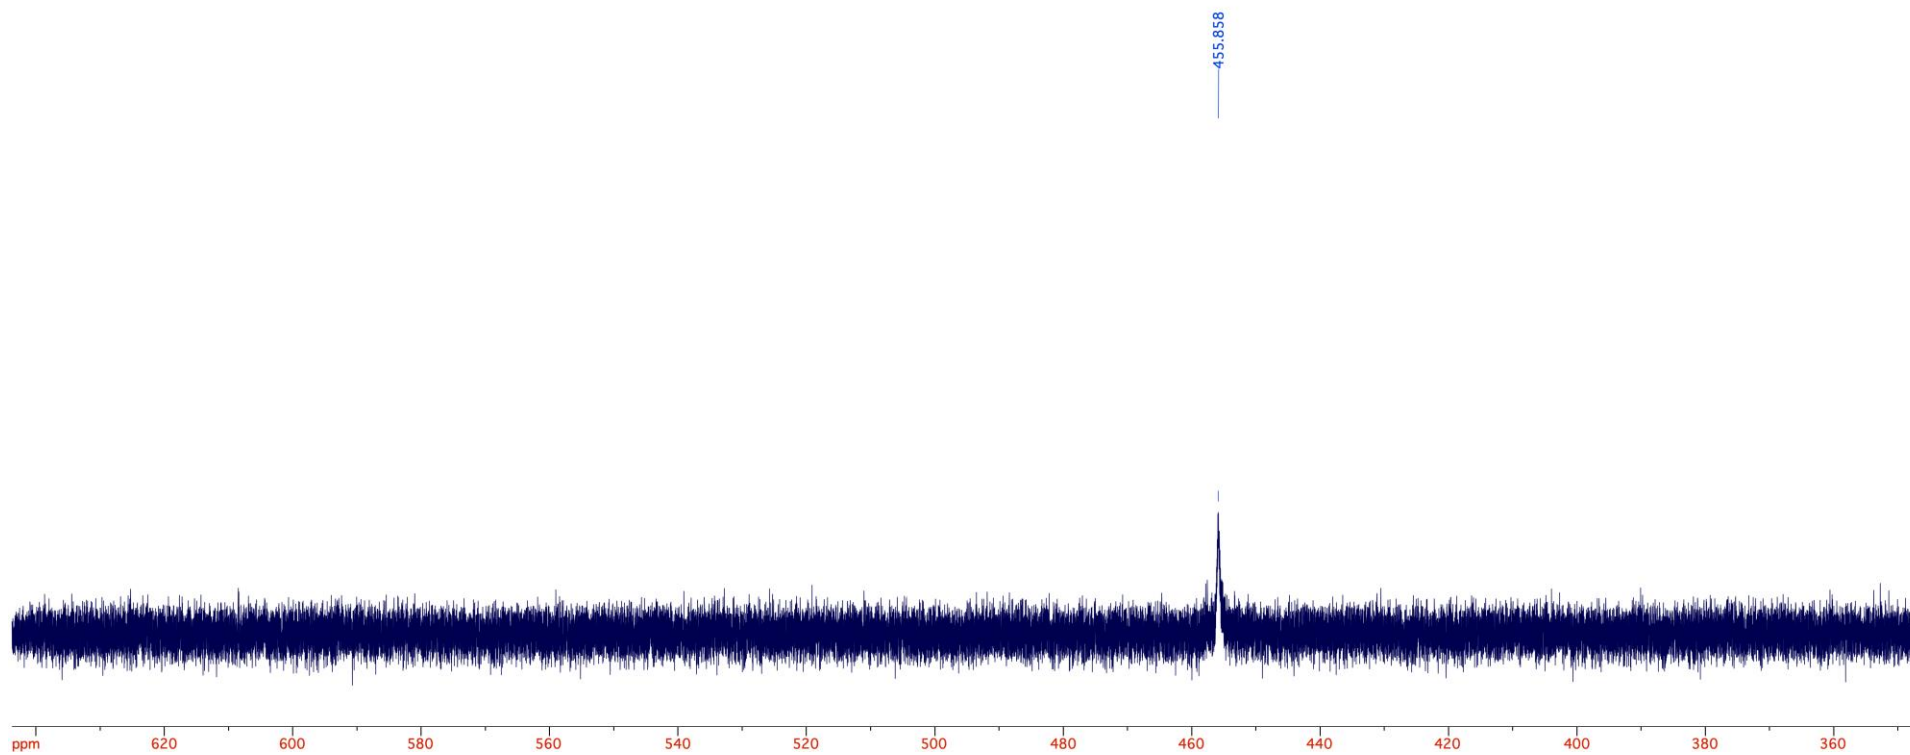

**Figure S25.**  $^{31}\text{P}$  NMR spectrum (122 MHz,  $\text{THF-}d_8$ , 278 K) of  $[(\text{WCA-IDipp})\text{As}=\text{P}(\text{IDipp})][\text{GaCl}_4]$  (**4b**).

## S5 X-Band EPR spectra

### S5.1 [(WCA-IDipp)PP(IDipp)]<sup>•</sup> (**5a**)

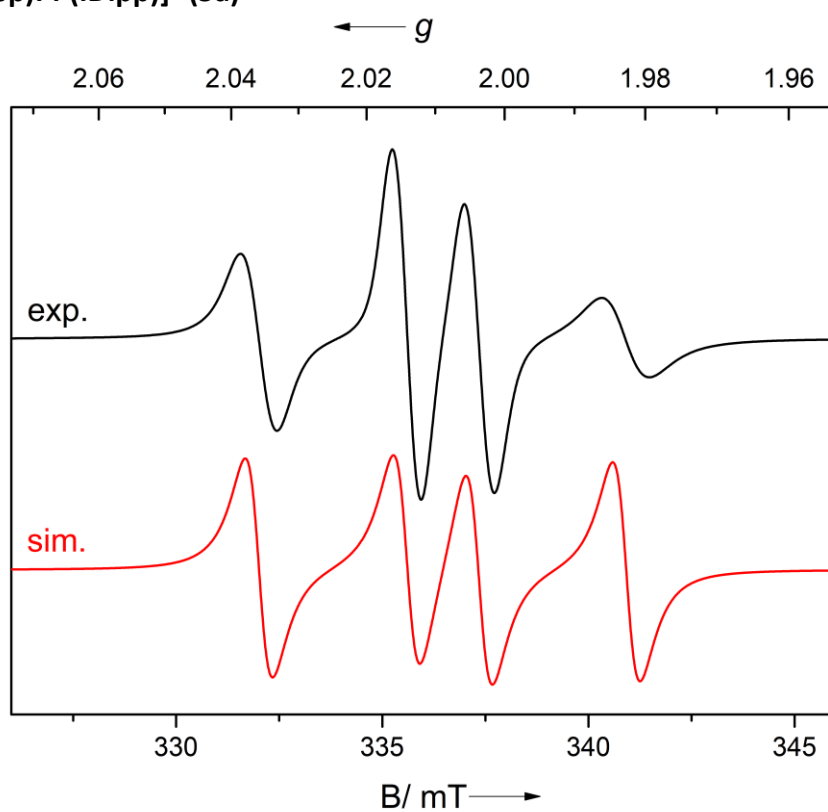

**Figure S 26.** Experimental (black) and simulated (red) X-band EPR spectrum (9.460444 GHz) of radical **5a** in thf solution at room temperature, displaying a  $g = 2.0087$  with couplings of  $a(^{31}\text{P1}) = 53.5$  G and  $a(^{31}\text{P2}) = 35.9$  G. For the simulation a Lorentzian line broadening  $[0, 1.15]$  was used.

S5.1 [(WCA-IDipp)AsP(IDipp)]<sup>•</sup> (**5b**)

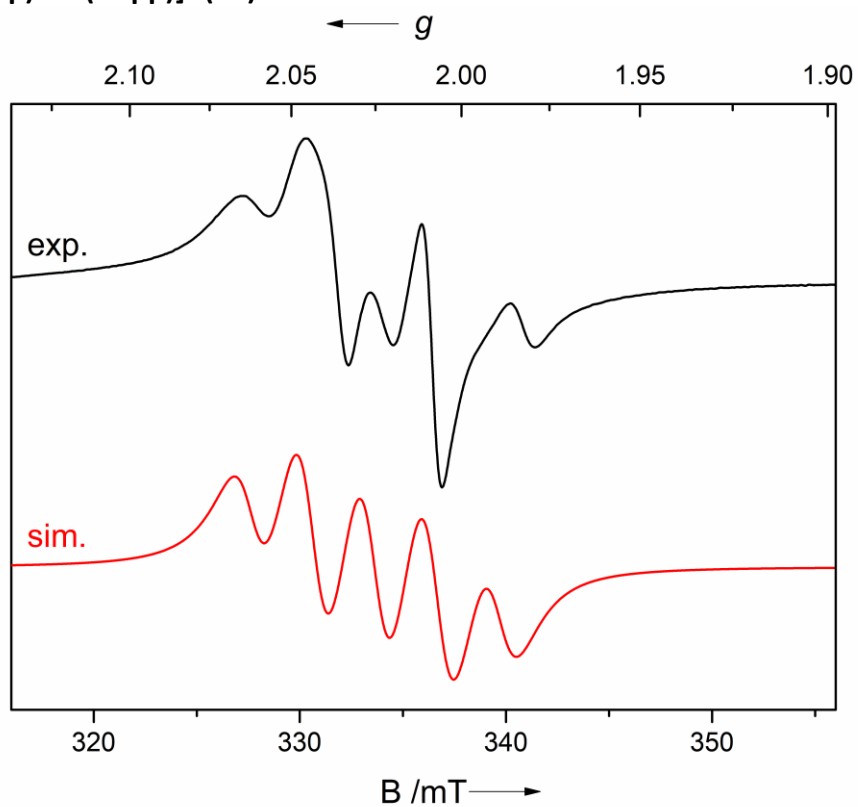

**Figure S27.** Experimental (black) and simulated (red) X-band EPR spectrum (9.456808 GHz) of radical **5b** in thf solution at room temperature, displaying a  $g = 2.0249$  with couplings of  $a(^{31}\text{P1}) = 33.9$  G and  $a(^{75}\text{As}) = 26.8$  G. For the simulation a Lorentzian line broadening [0, 2.0] was used.

## S6 Computational Details

All computations were performed using the density functional method B97-D (S. Grimme) as implemented in the Gaussian09 program.<sup>[7]</sup> For all main group elements (C, H, B, F, P and As) the all-electron triple- $\zeta$  basis set (6-311G\*\*) was used.<sup>[8]</sup> Natural Bond Orbital (NBO) analysis (Wiberg Bond Index, WBI) was carried out using NBO version 3,<sup>[9]</sup> which is part of the Gaussian09 program package. For quantitative analysis of the spin density the free software *Mulwfn* 3.6 was used.<sup>[10]</sup>

**Table S7:** Energies for all optimized structures

| Compound                             | $E_{0K}^a$ [Ha] | $E_{298K}^b$ [Ha] | $H_{298K}^b$ [Ha] | $G_{298K}^b$ [Ha] |
|--------------------------------------|-----------------|-------------------|-------------------|-------------------|
| P <sub>2</sub> cation ( <b>4a</b> )  | -5207.408046    | -5207.314306      | -5207.313362      | -5207.537450      |
| As-P cation ( <b>4b</b> )            | -7103.041150    | -7102.946329      | -7102.945385      | -7103.173142      |
| P <sub>2</sub> radical ( <b>5a</b> ) | -5207.611732    | -5207.517939      | -5207.516995      | -5207.740718      |
| As-P radical ( <b>5b</b> )           | -7103.239316    | -7103.144291      | -7103.143347      | -7103.373367      |

<sup>a</sup> DFT energy incl. ZPE.

<sup>b</sup> standard conditions T = 298.15 K and p = 1 atm.



### S6.1 Electron Spin Density Distribution for [(WCA-IDipp)PP(IDipp)]<sup>•</sup> (5a)

Table S7. Electron Spin Density Distribution for Radical 5a. Atom numbering according to given .mol file.

| Atom | Value | Electron Spin Density |               |
|------|-------|-----------------------|---------------|
|      |       | % of sum              | % of sum abs. |
| P1   | 0.48  | 48.3                  | 47.8          |
| P2   | 0.24  | 24.0                  | 23.8          |
| N18  | 0.01  | 1.2                   | 1.2           |
| N19  | 0.01  | 1.2                   | 1.2           |
| N20  | 0.06  | 5.7                   | 5.6           |
| N21  | 0.05  | 4.9                   | 4.9           |
| C25  | 0.01  | 1.2                   | 1.1           |
| C43  | 0.04  | 3.6                   | 3.6           |
| C57  | 0.01  | 1.2                   | 1.2           |
| C65  | 0.02  | 2.5                   | 2.4           |

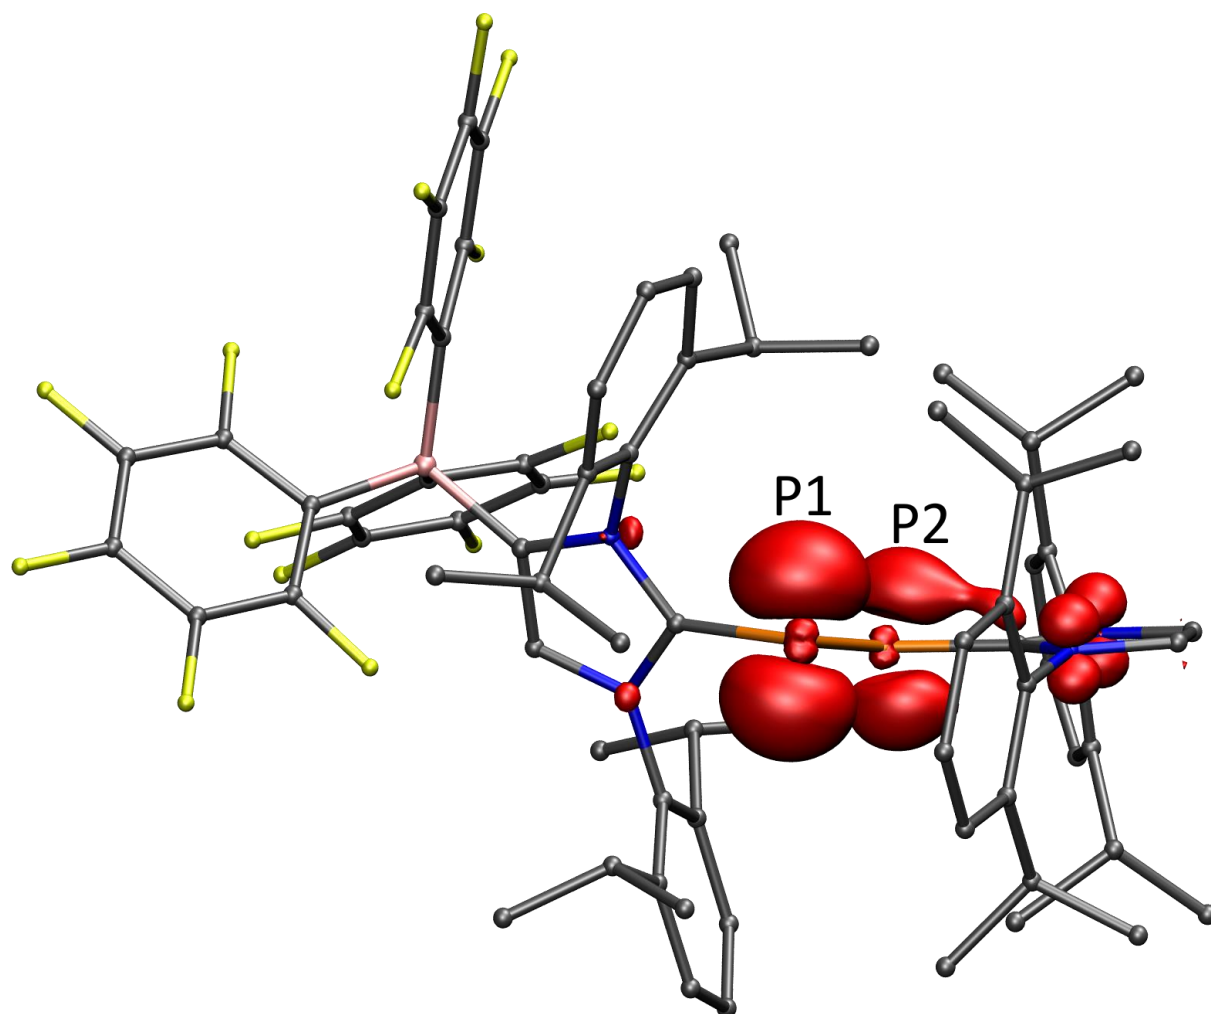

Figure S28. Plotted Spin density for radical 5a.

## S6.2 Electron Spin Density Distribution for [(WCA-IDipp)AsP(IDipp)]<sup>•</sup> (5b)

Table S8. Electron Spin Density Distribution for Radical 5b. Atom numbering according to given .mol file.

| Atom | Electron Spin Density |          |               |
|------|-----------------------|----------|---------------|
|      | Value                 | % of sum | % of sum abs. |
| As1  | 0.53                  | 53.4     | 52.4          |
| P2   | 0.21                  | 21.3     | 20.9          |
| N18  | 0.01                  | 1.3      | 1.2           |
| N19  | 0.01                  | 1.2      | 1.2           |
| N20  | 0.05                  | 4.9      | 4.8           |
| N21  | 0.04                  | 4.3      | 4.2           |
| C24  | 0.01                  | 1.1      | 1.1           |
| C102 | 0.03                  | 3.0      | 2.9           |
| C103 | 0.01                  | 1.2      | 1.2           |
| C105 | 0.02                  | 2.1      | 2.0           |

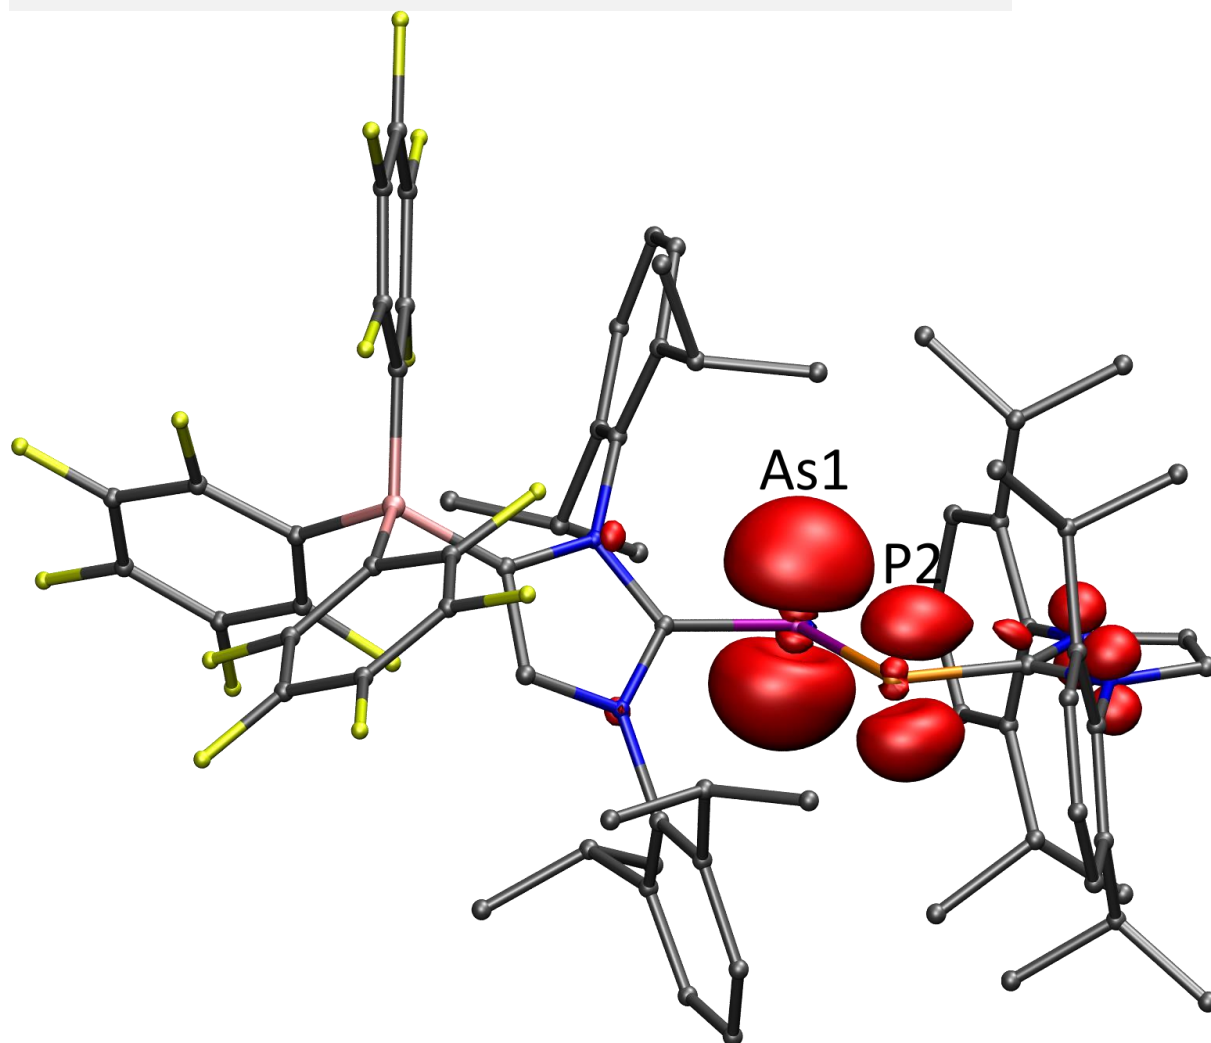

Figure S29. Plotted Spin Density for radical 5b.

### S6.3 Plot of the Single Occupied Molecular Orbitals (SOMO)

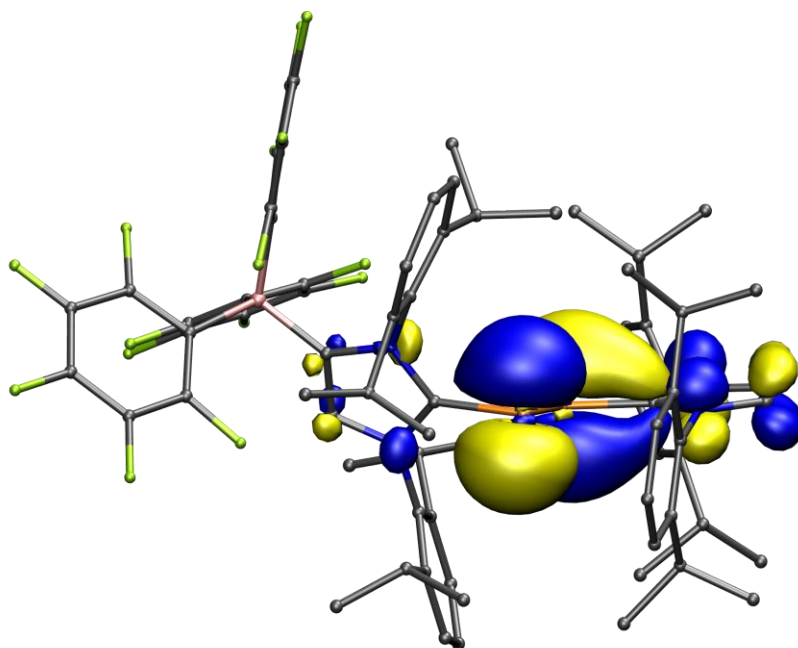

Figure S30. Plot of the Single Occupied Molecular Orbital of 5a.

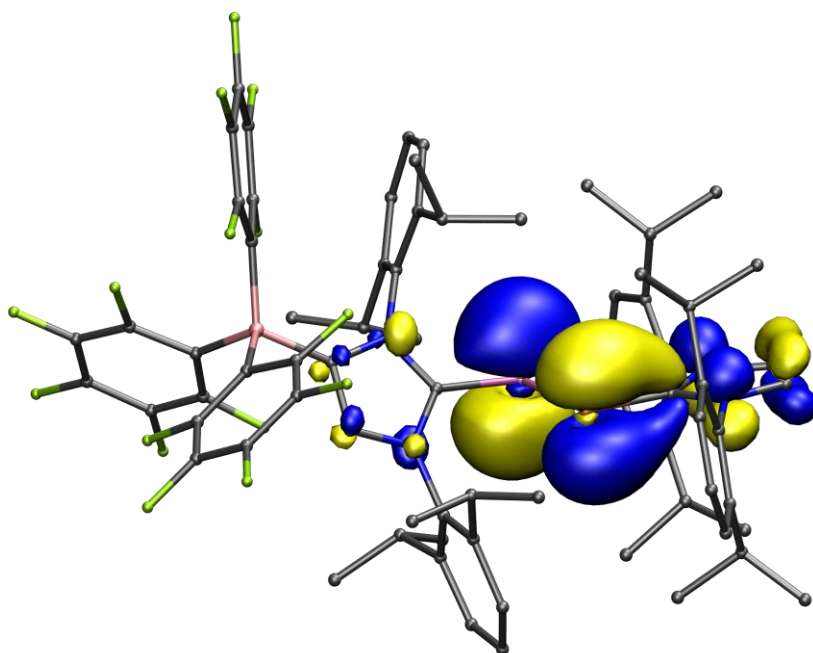

Figure S31. Plot of the Single Occupied Molecular Orbital of 5b.

## S7 References

- [1] CrysAlisPRO, Oxford Diffraction/Agilent Technologies UK Ltd, Yarnton, England.
- [2] Sheldrick, G. M. *Acta Crystallogr., Sect. A: Found. Crystallogr.*, 2008, **64**, 112.
- [3] A. Doddi, D. Bockfeld, T. Bannenberg, P. G. Jones and M. Tamm, *Angew. Chem. Int. Ed.*, 2014, **53**, 13568–13572.
- [4] L. P. Ho, A. Nasr, P. G. Jones, A. Altun, F. Neese, G. Bistoni and M. Tamm, *Chem. Eur. J.*, 2018, **24**, 18922–18932.
- [5] a) R. A. Sulzbach and A. F. M. Iqbal, *Angew. Chem.*, 1971, **83**, 145; b) P. K. Majhi, H. Ikeda, T. Sasamori, H. Tsurugi, K. Mashima and N. Tokitoh, *Organometallics*, 2017, **36**, 1224–1226.
- [6] S. Stoll and A. Schweiger, *J. Magn. Reson.*, 2006, **178**, 42.
- [7] Gaussian 09, Revision A.1, M. J. Frisch, G. W. Trucks, H. B. Schlegel, G. E. Scuseria, M. A. Robb, J. R. Cheeseman, G. Scalmani, V. Barone, B. Mennucci, G. A. Petersson, H. Nakatsuji, M. Caricato, X. Li, H. P. Hratchian, A. F. Izmaylov, J. Bloino, G. Zheng, J. L. Sonnenberg, M. Hada, M. Ehara, K. Toyota, R. Fukuda, J. Hasegawa, M. Ishida, T. Nakajima, Y. Honda, O. Kitao, H. Nakai, T. Vreven, J. A. Montgomery, Jr., J. E. Peralta, F. Ogliaro, M. Bearpark, J. J. Heyd, E. Brothers, K. N. Kudin, V. N. Staroverov, R. Kobayashi, J. Normand, K. Raghavachari, A. Rendell, J. C. Burant, S. S. Iyengar, J. Tomasi, M. Cossi, N. Rega, J. M. Millam, M. Klene, J. E. Knox, J. B. Cross, V. Bakken, C. Adamo, J. Jaramillo, R. Gomperts, R. E. Stratmann, O. Yazyev, A. J. Austin, R. Cammi, C. Pomelli, J. W. Ochterski, R. L. Martin, K. Morokuma, V. G. Zakrzewski, G. A. Voth, P. Salvador, J. J. Dannenberg, S. Dapprich, A. D. Daniels, Ö. Farkas, J. B. Foresman, J. V. Ortiz, J. Cioslowski, and D. J. Fox, Gaussian, Inc., Wallingford CT, **2009**.
- [8] X. Cao, M. Dolg, *J. Chem. Phys.* **2001**, *115*, 7348.
- [9] a) J. P. Foster and F. Weinhold, *J. Am. Chem. Soc.* **1980**, *102*, 7211; b) A. E. Reed, F. Weinhold, *J. Chem. Phys.* **1983**, *78*, 4066; c) A. E. Reed, R. B. Weinstock, F. Weinhold, *J. Chem. Phys.* **1985**, *83*, 735; d) A. E. Reed, F. Weinhold, *J. Chem. Phys.* **1985**, *83*, 1736.
- [10] T. Lu, Multiwfn (Version 3.6) - A Multifunctional Wavefunction Analyzer, <http://sobereva.com/multiwfn/>.
